# Supplementary material for: Investigating phenotypes of pulmonary COVID-19 recovery: A longitudinal observational prospective multicenter trial
Source: eLife. 2022 Feb 8;11:e72500. doi: 10.7554/eLife.72500 (PMC8896831; doi:10.7554/eLife.72500)
Supplement: Source data 1. [file elife-72500-data1.xlsx]

## Sheet: figure 2 source data 1
ID	Follow-up, months	Visit number	Severity	Symptoms present	Dyspnea	Cough	Fever	Night sweating	Hyposmia	Imp. performance	Sleep disorder	Pain	GI symptoms
P001	0	0	Hospitalized	yes	yes	yes	yes	no	no	yes	no	yes	no
P001	2	1	Hospitalized	no	no	no	no	no	no	no	no	no	no
P001	3	2	Hospitalized	no	no	no	no	no	no	no	no	no	no
P001	6	3	Hospitalized	yes	no	no	no	no	no	yes	no	no	no
P002	0	0	Hospitalized oxygen therapy	yes	yes	yes	yes	yes	no	no	no	yes	yes
P002	2	1	Hospitalized oxygen therapy	yes	yes	no	no	yes	no	no	no	no	no
P002	3	2	Hospitalized oxygen therapy	yes	no	yes	no	no	no	no	no	no	no
P002	6	3	Hospitalized oxygen therapy	yes	no	yes	no	no	no	no	no	no	no
P003	0	0	Hospitalized oxygen therapy	yes	yes	yes	yes	yes	no	yes	no	no	no
P003	2	1	Hospitalized oxygen therapy	yes	no	no	no	no	no	yes	no	no	no
P003	3	2	Hospitalized oxygen therapy	yes	yes	no	no	no	yes	yes	no	no	no
P003	6	3	Hospitalized oxygen therapy	yes	yes	no	no	no	yes	yes	no	no	no
P004	0	0	Outpatient	yes	yes	no	no	no	no	yes	no	yes	yes
P004	2	1	Outpatient	yes	yes	no	no	no	no	yes	no	no	no
P004	3	2	Outpatient	yes		no	no	no	no	yes	yes	no	no
P004	6	3	Outpatient	yes	yes	no	no	yes	no	yes	no	yes	no
P005	0	0	Hospitalized	yes	yes	yes	no	no	no	no	no	no	no
P005	2	1	Hospitalized	yes	no	no	no	no	no	yes	no	yes	no
P005	3	2	Hospitalized	yes	yes	no	no	no	no	yes	no	no	no
P005	6	3	Hospitalized	yes	yes	no	no	yes	no	yes	no	no	no
P006	0	0	Outpatient	yes	yes	yes	no	yes	yes	yes	no	yes	no
P006	2	1	Outpatient	yes	no	yes	no	yes	no	yes	no	no	no
P006	3	2	Outpatient	yes	no	yes	no	no	yes	no	no	yes	no
P006	6	3	Outpatient	yes	no	no	no	no	no	no	no	yes	no
P007	0	0	Hospitalized	yes	yes	yes	yes	no	yes	no	no	yes	yes
P007	2	1	Hospitalized	yes	yes	no	no	yes	no	yes	yes	yes	no
P007	3	2	Hospitalized	yes	yes	no	no	yes	no	yes	yes	no	yes
P007	6	3	Hospitalized	yes	yes	no	no	yes	no	no	yes	no	no
P008	0	0	Outpatient	yes	yes	yes	yes	no	no	yes	no	no	yes
P008	2	1	Outpatient	yes	yes	yes	yes	no	no	yes	no	no	yes
P008	3	2	Outpatient	yes	no	no	no	yes	no	yes	no	no	no
P008	6	3	Outpatient	no	no			no					no
P009	0	0	Outpatient	yes	no	yes	yes	no	no	no	no	no	no
P009	2	1	Outpatient	no	no	no	no	no	no	no	no	no	no
P009	3	2	Outpatient	no	no	no	no	no	no	no	no	no	no
P009	6	3	Outpatient	no	no	no	no	no	no	no	no	no	no
P010	0	0	Hospitalized oxygen therapy	yes	no	yes	yes	yes	no	no	no	no	no
P010	2	1	Hospitalized oxygen therapy	yes	no	no	no	no	no	yes	no	no	no
P010	3	2	Hospitalized oxygen therapy	no			no
P010	6	3	Hospitalized oxygen therapy	no	no	no	no	no	no	no	no	no	no
P011	0	0	Hospitalized	yes	yes	yes	no	yes	yes	yes	yes	yes	yes
P011	2	1	Hospitalized	yes	yes	no	no	yes	yes	yes	yes	yes	yes
P011	3	2	Hospitalized	yes	yes	no	no	yes	no	yes	yes	yes	no
P011	6	3	Hospitalized	no	no			no					no
P012	0	0	Hospitalized	yes	no	yes	no	no	no	yes	no	yes	yes
P012	2	1	Hospitalized	yes	no	yes	no	no	no	no	no	no	no
P012	3	2	Hospitalized	no	no	no	no	no	no	no	no	no	no
P012	6	3	Hospitalized	yes	no	yes	no	no	no	no	no	no	no
P013	0	0	Hospitalized oxygen therapy	yes	yes	yes	yes	yes	no	yes	no	no	yes
P013	2	1	Hospitalized oxygen therapy	yes	yes	no	no	no	no	yes	no	no	no
P013	3	2	Hospitalized oxygen therapy	yes	yes	no	no	no	no	yes	no	yes	no
P013	6	3	Hospitalized oxygen therapy	yes	yes	no	no	no	no	yes	yes	no	yes
P014	0	0	Hospitalized	yes	yes	yes	yes	yes	yes	yes	no	yes	yes
P014	2	1	Hospitalized	yes	yes	yes	no	yes	yes	yes	no	yes	yes
P014	3	2	Hospitalized	yes	yes	yes	no	yes	yes	yes	yes	yes	yes
P014	6	3	Hospitalized	yes	yes	yes	no	yes	yes	yes	yes	yes	no
P015	0	0	Hospitalized oxygen therapy	yes	yes	yes	yes	no	no	no	no	no	no
P015	2	1	Hospitalized oxygen therapy	yes	no	no	no	no	no	yes	no	no	no
P015	3	2	Hospitalized oxygen therapy	yes	no	no	no	no	no	no	yes	no	no
P015	6	3	Hospitalized oxygen therapy	no	no			no					no
P016	0	0	Hospitalized ICU	yes	yes	yes	yes	yes	yes	yes	no	no	yes
P016	2	1	Hospitalized ICU	yes	yes	no	no	no	no	yes	no	no	no
P016	3	2	Hospitalized ICU	yes	no	yes	no	no	no	no	no	no	no
P016	6	3	Hospitalized ICU	no	no			no					no
P017	0	0	Hospitalized	yes	yes	yes	no	yes	no	yes	no	no	no
P017	2	1	Hospitalized	yes	yes	yes	no	yes	no	yes	no	no	no
P017	3	2	Hospitalized	yes	no	yes	no	yes	no	yes	no	yes	no
P017	6	3	Hospitalized	no	no	no	no	no	no	no	no	no	no
P018	0	0	Hospitalized	yes	yes	yes	yes	yes	no	yes	yes	no	yes
P018	2	1	Hospitalized	yes	no	yes	no	no	no	yes	yes	no	yes
P018	3	2	Hospitalized	yes	no	no	no	no	no	no	no	yes	no
P018	6	3	Hospitalized	yes	yes	no	no	no	no	no	no	no	no
P019	0	0	Hospitalized	yes	no	yes	yes	yes	yes	yes	no	no	yes
P019	2	1	Hospitalized	yes	no	no	no	no	no	no	no	no	yes
P019	3	2	Hospitalized	no	no	no	no	no	no	no	no	no	no
P019	6	3	Hospitalized	no	no	no	no	no	no	no	no	no	no
P020	0	0	Hospitalized oxygen therapy	yes	yes	yes	yes	yes	yes	yes	no	yes	yes
P020	2	1	Hospitalized oxygen therapy	yes	yes	no	no	no	no	yes	no	yes	no
P020	3	2	Hospitalized oxygen therapy	yes	yes	yes	no	no	no	yes	yes	no	no
P020	6	3	Hospitalized oxygen therapy	yes	no	no	no	no	no	yes	yes	no	yes
P021	0	0	Outpatient	yes	no	no	no	no	yes	yes	no	no	no
P021	2	1	Outpatient	yes	yes	no	no	no	no	yes	no	no	no
P021	3	2	Outpatient	no	no	no	no	no	no	no	no	no	no
P021	6	3	Outpatient	no	no	no	no	no	no	no	no	no	no
P022	0	0	Hospitalized ICU	yes	yes	yes	yes	yes	no	yes	no	no	no
P022	2	1	Hospitalized ICU	yes	no	no	no	no	no	yes	no	yes	no
P022	3	2	Hospitalized ICU	yes	no	no	no	no	no	yes	no	no	no
P022	6	3	Hospitalized ICU	no	no	no	no	no	no	no	no	no	no
P023	0	0	Hospitalized oxygen therapy	yes	yes	yes	yes	yes	no	yes	yes	no	no
P023	2	1	Hospitalized oxygen therapy	yes	yes	no	no	yes	no	yes	yes	no	no
P023	3	2	Hospitalized oxygen therapy	yes	yes	no	no	no	yes	yes	no	no	yes
P023	6	3	Hospitalized oxygen therapy	no	no			no					no
P024	0	0	Hospitalized oxygen therapy	yes	yes	yes	yes	yes	no	yes	no	yes	no
P024	2	1	Hospitalized oxygen therapy	yes	no	no	no	no	yes	no	no	no	no
P024	3	2	Hospitalized oxygen therapy	yes	yes	no	no	no	no	no	yes	yes	yes
P024	6	3	Hospitalized oxygen therapy	no	no	no	no	no	no	no	no	no	no
P025	0	0	Hospitalized oxygen therapy	yes	yes	yes	yes	yes	yes	yes	no	no	no
P025	2	1	Hospitalized oxygen therapy	yes	yes	no	no	no	no	yes	no	no	no
P025	3	2	Hospitalized oxygen therapy	yes	no	no	no	no	yes	no	no	no	no
P025	6	3	Hospitalized oxygen therapy	yes	yes	no	no	no	no	no	no	no	no
P026	0	0	Hospitalized oxygen therapy	yes	yes	yes	yes	yes	yes	yes	no	no	no
P026	2	1	Hospitalized oxygen therapy	yes	yes	yes	no	no	no	yes	no	no	no
P026	3	2	Hospitalized oxygen therapy	no	no	no	no	no	no	no	no	no	no
P026	6	3	Hospitalized oxygen therapy	no	no	no	no	no	no	no	no	no	no
P027	0	0	Hospitalized	yes	yes	no	yes	no	no	yes	no	no	no
P027	2	1	Hospitalized	no	no	no	no	no	no	no	no	no	no
P027	3	2	Hospitalized	yes	yes	no	no	no	no	yes	no	no	no
P027	6	3	Hospitalized	yes	yes	no	no	no	no	yes	no	no	yes
P028	0	0	Outpatient	yes	yes	no	no	yes	no	yes	no	yes	yes
P028	2	1	Outpatient	yes	yes	no	no	yes	no	yes	no	no	no
P028	3	2	Outpatient	yes	no	no	no	yes	yes	no	no	no	no
P028	6	3	Outpatient	yes	yes	no	no	yes	yes	no	yes	no	yes
P029	0	0	Hospitalized	yes	no	yes	yes	yes	no	yes	yes	yes	yes
P029	2	1	Hospitalized	yes	no	yes	no	no	no	no	yes	no	no
P029	3	2	Hospitalized	yes	no	yes	no	no	no	no	yes	no	no
P029	6	3	Hospitalized	yes	no	yes	no	no	no	no	yes	no	no
P030	0	0	Hospitalized	yes	yes	yes	yes	no	no	yes	no	yes	yes
P030	2	1	Hospitalized	no	no	no	no	no	no	no	no	no	no
P030	3	2	Hospitalized	no	no	no	no	no	no	no	no	no	no
P030	6	3	Hospitalized	no	no	no	no	no	no	no	no	no	no
P031	0	0	Hospitalized	yes	yes	yes	no	no	yes	yes	no	no	no
P031	2	1	Hospitalized	no	no	no	no	no	no	no	no	no	no
P031	3	2	Hospitalized	no	no	no	no	no	no	no	no	no	no
P031	6	3	Hospitalized	no	no	no	no	no	no	no	no	no	no
P032	0	0	Hospitalized oxygen therapy	yes	yes	no	yes	no	no	yes	no	no	no
P032	2	1	Hospitalized oxygen therapy	no	no	no	no	no	no	no	no	no	no
P032	3	2	Hospitalized oxygen therapy	no	no	no	no	no	no	no	no	no	no
P032	6	3	Hospitalized oxygen therapy	no	no	no	no	no	no	no	no	no	no
P033	0	0	Outpatient	no	no	no	no	no	no	no	no	no	no
P033	2	1	Outpatient	no	no	no	no	no	no	no	no	no	no
P033	3	2	Outpatient	yes	no	no	no	no	yes	yes	no	yes	no
P033	6	3	Outpatient	no	no	no	no	no	no	no	no	no	no
P034	0	0	Hospitalized oxygen therapy	yes	yes	no	no	no	no	yes	no	no	no
P034	2	1	Hospitalized oxygen therapy	no	no	no	no	no	no	no	no	no	no
P034	3	2	Hospitalized oxygen therapy	no	no	no	no	no	no	no	no	no	no
P034	6	3	Hospitalized oxygen therapy	no	no			no					no
P035	0	0	Hospitalized oxygen therapy	yes	no	no	no	no	no	yes	no	no	no
P035	2	1	Hospitalized oxygen therapy	no	no	no	no	no	no	no	no	no	no
P035	3	2	Hospitalized oxygen therapy	no	no	no	no	no	no	no	no	no	no
P035	6	3	Hospitalized oxygen therapy	no	no	no	no	no	no	no	no	no	no
P036	0	0	Outpatient	yes	no	yes	no	no	no	no	no	no	no
P036	2	1	Outpatient	no	no	no	no	no	no	no	no	no	no
P036	3	2	Outpatient	yes	no	no	no	yes	no	no	no	yes	no
P036	6	3	Outpatient	yes	no	no	no	no	no	yes	no	no	no
P037	0	0	Hospitalized oxygen therapy	yes	no	no	yes	no	no	yes	no	no	no
P037	2	1	Hospitalized oxygen therapy	no	no	no	no	no	no	no	no	no	no
P037	3	2	Hospitalized oxygen therapy	no	no	no	no	no	no	no	no	no	no
P037	6	3	Hospitalized oxygen therapy	yes	yes	no	no	no	no	no	no	no	no
P038	0	0	Hospitalized oxygen therapy	yes	no	yes	yes	no	no	yes	no	no	yes
P038	2	1	Hospitalized oxygen therapy	no	no	no	no	no	no	no	no	no	no
P038	3	2	Hospitalized oxygen therapy	yes	yes	no	no	no	no	yes	no	no	no
P038	6	3	Hospitalized oxygen therapy	yes	no	no	no	no	no	yes	yes	no	no
P039	0	0	Hospitalized oxygen therapy	yes	yes	yes	yes	yes	no	yes	yes	no	no
P039	2	1	Hospitalized oxygen therapy	yes	yes	no	no	yes	no	yes	yes	no	no
P039	3	2	Hospitalized oxygen therapy	yes	yes	no	no	yes	no	no	yes	no	no
P039	6	3	Hospitalized oxygen therapy	yes	yes	no	no	yes	yes	no	yes	no	no
P040	0	0	Hospitalized oxygen therapy	yes	no	yes	yes	yes	yes	yes	no	no	yes
P040	2	1	Hospitalized oxygen therapy	no	no	no	no	no	no	no	no	no	no
P040	3	2	Hospitalized oxygen therapy	yes	yes	no	no	no	no	no	no	no	no
P040	6	3	Hospitalized oxygen therapy	no	no	no	no	no	no	no	no	no	no
P041	0	0	Hospitalized oxygen therapy	yes	yes	yes	yes	no	no	yes	no	yes	yes
P041	2	1	Hospitalized oxygen therapy	yes	yes	no	yes	no	no	no	no	no	no
P041	3	2	Hospitalized oxygen therapy	yes	yes	no	no	no	no	yes	no	no	no
P041	6	3	Hospitalized oxygen therapy	no	no	no	no	no	no	no	no	no	no
P042	0	0	Hospitalized	yes	no	yes	yes	yes	no	yes	no	no	yes
P042	2	1	Hospitalized	yes	no	no	no	yes	no	no	no	no	no
P042	3	2	Hospitalized	yes	no	no	no	yes	no	no	no	no	no
P042	6	3	Hospitalized	yes	no	yes	no	yes	no	no	no	no	no
P043	0	0	Outpatient	yes	yes	yes	yes	yes	yes	yes	no	yes	no
P043	2	1	Outpatient	yes	no	yes	no	no	yes	no	no	yes	no
P043	3	2	Outpatient	yes	yes	no	no	yes	yes	yes	no	no	no
P043	6	3	Outpatient	no	no	no	no	no	no	no	no	no	no
P044	0	0	Hospitalized oxygen therapy	yes	no	yes	yes	yes	no	yes	yes	no	yes
P044	2	1	Hospitalized oxygen therapy	no	no	no	no	no	no	no	no	no	no
P044	3	2	Hospitalized oxygen therapy	yes	yes	no	no	no	no	yes	no	no	no
P044	6	3	Hospitalized oxygen therapy	no	no	no	no	no	no	no	no	no	no
P045	0	0	Hospitalized oxygen therapy	yes	yes	yes	yes	yes	yes	yes	yes	yes	yes
P045	2	1	Hospitalized oxygen therapy	yes	no	no	no	yes	no	yes	no	no	no
P045	3	2	Hospitalized oxygen therapy	yes	no	no	no	yes	no	yes	no	yes	yes
P045	6	3	Hospitalized oxygen therapy	yes	no	no	no	yes	no	yes	no	no	no
P046	0	0	Hospitalized	yes	no	no	yes	no	no	no	no	no	no
P046	2	1	Hospitalized	no	no	no	no	no	no	no	no	no	no
P046	3	2	Hospitalized	yes	yes	yes	no	no	no	no	no	no	no
P046	6	3	Hospitalized	yes	no	yes	no	no	no	yes	no	no	no
P047	0	0	Hospitalized	yes	yes	no	yes	no	no	yes	yes	no	yes
P047	2	1	Hospitalized	no	no	no	no	no	no	no	no	no	no
P047	3	2	Hospitalized	no	no	no	no	no	no	no	no	no	no
P047	6	3	Hospitalized	no	no	no	no	no	no	no	no	no	no
P048	0	0	Hospitalized oxygen therapy	yes	no	no	yes	yes	no	yes	no	no	no
P048	2	1	Hospitalized oxygen therapy	yes	no	yes	no	no	no	no	no	no	no
P048	3	2	Hospitalized oxygen therapy	yes	no	yes	no	yes	no	yes	no	no	yes
P048	6	3	Hospitalized oxygen therapy	no	no	no	no	no	no	no	no	no	no
P049	0	0	Hospitalized oxygen therapy	yes	yes	yes	yes	no	no	yes	no	yes	no
P049	2	1	Hospitalized oxygen therapy	yes	yes	no	no	no	no	yes	no	no	no
P049	3	2	Hospitalized oxygen therapy	yes	yes	no	no	no	no	yes	no	no	no
P049	6	3	Hospitalized oxygen therapy	yes	yes	no	no	no	no	yes	no	no	no
P050	0	0	Outpatient	yes	yes	no	no	yes	no	yes	no	yes	yes
P050	2	1	Outpatient	yes	yes	no	no	no	no	yes	no	no	no
P050	3	2	Outpatient	yes	no	no	no	no	no	yes	no	no	no
P050	6	3	Outpatient	yes	yes	no	no	no	no	no	no	no	no
P051	0	0	Hospitalized oxygen therapy	yes	yes	yes	yes	yes	no	yes	no	yes	no
P051	2	1	Hospitalized oxygen therapy	yes	yes	yes	no	no	no	yes	no	no	no
P051	3	2	Hospitalized oxygen therapy	yes	yes	no	no	no	yes	yes	no	no	no
P051	6	3	Hospitalized oxygen therapy	no	no	no	no	no	no	no	no	no	no
P052	0	0	Hospitalized	yes	no	yes	no	no	no	yes	no	no	yes
P052	2	1	Hospitalized	yes	no	no	no	no	no	no	yes	no	no
P052	3	2	Hospitalized	no	no	no	no	no	no	no	no	no	no
P052	6	3	Hospitalized	no	no	no	no	no	no	no	no	no	no
P053	0	0	Hospitalized oxygen therapy	yes	yes	yes	yes	yes	no	yes	no	yes	no
P053	2	1	Hospitalized oxygen therapy	no	no	no	no	no	no	no	no	no	no
P053	3	2	Hospitalized oxygen therapy	no	no	no	no	no	no	no	no	no	no
P053	6	3	Hospitalized oxygen therapy	no	no	no	no	no	no	no	no	no	no
P054	0	0	Hospitalized oxygen therapy	yes	yes	yes	yes	yes	yes	yes	no	yes	yes
P054	2	1	Hospitalized oxygen therapy	no	no	no	no	no	no	no	no	no	no
P054	3	2	Hospitalized oxygen therapy	no	no	no	no	no	no	no	no	no	no
P054	6	3	Hospitalized oxygen therapy	no	no			no					no
P055	0	0	Hospitalized	yes	yes	no	yes	yes	yes	yes	yes	yes	yes
P055	2	1	Hospitalized	yes	no	no	no	no	yes	yes	yes	no	yes
P055	3	2	Hospitalized	yes	no	no	no	yes	yes	yes	yes	no	yes
P055	6	3	Hospitalized	yes	no	no	no	yes	no	no	yes	no	no
P056	0	0	Hospitalized oxygen therapy	yes	yes	yes	yes	no	no	yes	yes	no	no
P056	2	1	Hospitalized oxygen therapy	yes	no	no	no	no	no	yes	no	no	no
P056	3	2	Hospitalized oxygen therapy	yes	yes	no	no	no	no	yes	yes	no	yes
P056	6	3	Hospitalized oxygen therapy	no	no	no	no	no	no	no	no	no	no
P057	0	0	Outpatient	yes	no	no	no	no	no	yes	no	yes	no
P057	2	1	Outpatient	yes	no	no	no	no	no	yes	no	yes	no
P057	3	2	Outpatient	no	no	no	no	no	no	no	no	no	no
P057	6	3	Outpatient	no	no	no	no	no	no	no	no	no	no
P058	0	0	Hospitalized ICU	yes	yes	no	yes	no	no	yes	no	no	yes
P058	2	1	Hospitalized ICU	no	no	no	no	no	no	no	no	no	no
P058	3	2	Hospitalized ICU	no	no	no	no	no	no	no	no	no	no
P058	6	3	Hospitalized ICU	no	no	no	no	no	no	no	no	no	no
P059	0	0	Outpatient	yes	no	yes	no	no	yes	yes	no	no	yes
P059	2	1	Outpatient	yes	no	yes	no	no	yes	no	no	no	no
P059	3	2	Outpatient	yes	yes	yes	no	no	yes	yes	no	no	no
P059	6	3	Outpatient	yes	no	yes	no	yes	no	yes	no	no	yes
P060	0	0	Hospitalized	yes	no	yes	yes	yes	no	yes	yes	yes	yes
P060	2	1	Hospitalized	no	no	no	no	no	no	no	no	no	no
P060	3	2	Hospitalized	yes	no	yes	no	no	no	yes	no	no	no
P060	6	3	Hospitalized	no	no	no	no	no	no	no	no	no	no
P061	0	0	Hospitalized	yes	yes	yes	yes	yes	yes	yes	yes	yes	yes
P061	2	1	Hospitalized	yes	yes	yes	no	yes	yes	yes	no	yes	no
P061	3	2	Hospitalized	yes	yes	yes	no	yes	yes	yes	yes	yes	yes
P061	6	3	Hospitalized	yes	no	yes	no	no	yes	no	yes	no	no
P062	0	0	Outpatient	yes	yes	yes	no	no	no	yes	yes	no	no
P062	2	1	Outpatient	yes	no	no	no	no	no	yes	yes	no	no
P062	3	2	Outpatient	no	no	no	no	no	no	no	no	no	no
P062	6	3	Outpatient	yes	no	no	no	no	no	no	yes	no	no
P063	0	0	Hospitalized ICU	yes	yes	yes	yes	yes	yes	yes	yes	yes	yes
P063	2	1	Hospitalized ICU	yes	no	no	yes	no	no	yes	yes	no	no
P063	3	2	Hospitalized ICU	yes	no	no	no	no	no	yes	yes	no	no
P063	6	3	Hospitalized ICU	no	no			no					no
P064	0	0	Outpatient	yes	yes	yes	yes	no	yes	yes	yes	yes	yes
P064	2	1	Outpatient	yes	yes	no	no	no	yes	yes	no	no	no
P064	3	2	Outpatient	yes	yes	no	no	yes	yes	yes	yes	yes	no
P064	6	3	Outpatient	yes	yes	no	no	no	yes	yes	no	yes	no
P065	0	0	Hospitalized oxygen therapy	yes	yes	no	yes	yes	yes	yes	yes	yes	no
P065	2	1	Hospitalized oxygen therapy	yes	yes	yes	no	no	no	yes	yes	no	no
P065	3	2	Hospitalized oxygen therapy	yes	yes	no	no	no	no	yes	no	no	no
P065	6	3	Hospitalized oxygen therapy	yes	no	no	no	no	no	yes	yes	no	no
P066	0	0	Hospitalized oxygen therapy	yes	yes	no	yes	yes	yes	yes	no	yes	no
P066	2	1	Hospitalized oxygen therapy	yes	yes	yes	no	no	no	yes	no	no	no
P066	3	2	Hospitalized oxygen therapy	no	no	no	no	no	no	no	no	no	no
P066	6	3	Hospitalized oxygen therapy	yes	no	yes	no	no	yes	no	no	no	no
P067	0	0	Hospitalized	yes	no	no	yes	yes	no	yes	no	yes	yes
P067	2	1	Hospitalized	yes	no	no	no	no	no	yes	no	no	no
P067	3	2	Hospitalized	no	no	no	no	no	no	no	no	no	no
P067	6	3	Hospitalized	no	no			no					no
P068	0	0	Outpatient	yes	yes	no	no	no	yes	yes	no	yes	yes
P068	2	1	Outpatient	no	no	no	no	no	no	no	no	no	no
P068	3	2	Outpatient	no	no	no	no	no	no	no	no	no	no
P068	6	3	Outpatient	no	no	no	no	no	no	no	no	no	no
P069	0	0	Hospitalized oxygen therapy	yes	yes	yes	yes	no	yes	yes	no	no	yes
P069	2	1	Hospitalized oxygen therapy	yes	no	no	no	no	no	no	no	no	yes
P069	3	2	Hospitalized oxygen therapy	yes	no	yes	no	no	no	yes	no	no	no
P069	6	3	Hospitalized oxygen therapy	no	no			no					no
P070	0	0	Hospitalized oxygen therapy	yes	no	yes	yes	yes	yes	yes	no	yes	no
P070	2	1	Hospitalized oxygen therapy	yes	no	no	no	no	yes	no	no	yes	no
P070	3	2	Hospitalized oxygen therapy	yes	no	no	no	no	yes	yes	no	no	no
P070	6	3	Hospitalized oxygen therapy	yes	no	no	no	no	yes	no	no	no	no
P071	0	0	Hospitalized oxygen therapy	yes	yes	yes	yes	yes	yes	yes	yes	yes	no
P071	2	1	Hospitalized oxygen therapy	yes	no	no	no	no	no	yes	no	no	no
P071	3	2	Hospitalized oxygen therapy	no	no	no	no	no	no	no	no	no	no
P071	6	3	Hospitalized oxygen therapy	yes	no	no	no	no	no	no	yes	no	no
P072	0	0	Hospitalized	yes	yes	yes	yes	yes	yes	yes	no	no	no
P072	2	1	Hospitalized	no	no	no	no	no	no	no	no	no	no
P072	3	2	Hospitalized	yes	yes	no	no	no	yes	no	no	no	no
P072	6	3	Hospitalized	no	no	no	no	no	no	no	no	no	no
P073	0	0	Hospitalized	yes	yes	yes	yes	no	yes	yes	no	no	yes
P073	2	1	Hospitalized	yes	no	no	no	no	yes	no	no	no	no
P073	3	2	Hospitalized	no									no
P073	6	3	Hospitalized	no	no			no					no
P074	0	0	Hospitalized ICU	yes	yes	yes	yes	no	yes	yes	yes	yes	no
P074	2	1	Hospitalized ICU	yes	yes	no	no	no	no	no	yes	no	no
P074	3	2	Hospitalized ICU	yes	yes	no	no	no	no	yes	no	no	no
P074	6	3	Hospitalized ICU	yes	yes	no	no	yes	no	no	no	no	no
P075	0	0	Hospitalized ICU	yes	no	yes	yes	yes	no	yes	no	no	no
P075	2	1	Hospitalized ICU	yes	yes	no	no	no	no	yes	no	no	no
P075	3	2	Hospitalized ICU	no	no	no	no	no	no	no	no	no	no
P075	6	3	Hospitalized ICU	no	no	no	no	no	no	no	no	no	no
P076	0	0	Hospitalized oxygen therapy	yes	yes	no	yes	no	no	yes	no	no	no
P076	2	1	Hospitalized oxygen therapy	yes	yes	no	no	no	no	yes	no	no	no
P076	3	2	Hospitalized oxygen therapy	yes	yes	no	no	no	no	yes	no	yes	no
P076	6	3	Hospitalized oxygen therapy	yes	no	no	no	no	no	yes	yes	no	no
P077	0	0	Hospitalized ICU	yes	yes	yes	yes	yes	no	yes	yes	yes	no
P077	2	1	Hospitalized ICU	yes	yes	yes	no	yes	no	yes	yes	no	no
P077	3	2	Hospitalized ICU	yes	no	no	no	no	no	yes	yes	yes	yes
P077	6	3	Hospitalized ICU	yes	yes	no	no	yes	no	yes	yes	yes	yes
P078	0	0	Outpatient	yes	yes	yes	yes	yes	yes	yes	no	no	no
P078	2	1	Outpatient	yes	no	no	no	no	no	yes	yes	no	no
P078	3	2	Outpatient	yes	yes	no	no	yes	no	yes	yes	no	no
P078	6	3	Outpatient	no	no			no					no
P079	0	0	Hospitalized	yes	no	yes	yes	yes	yes	yes	yes	yes	no
P079	2	1	Hospitalized	yes	no	no	no	yes	yes	no	yes	no	no
P079	3	2	Hospitalized	yes	no	no	no	no	yes	no	no	no	no
P079	6	3	Hospitalized	no	no			no					no
P080	0	0	Hospitalized ICU	yes	yes	yes	yes	no	no	yes	no	no	no
P080	2	1	Hospitalized ICU	yes	no	no	no	no	no	yes	no	no	no
P080	3	2	Hospitalized ICU	no	no	no	no	no	no	no	no	no	no
P080	6	3	Hospitalized ICU	no	no	no	no	no	no	no	no	no	no
P081	0	0	Hospitalized ICU	yes	yes	yes	yes	yes	no	yes	no	no	yes
P081	2	1	Hospitalized ICU	yes	yes	no	no	no	no	yes	no	no	no
P081	3	2	Hospitalized ICU	yes	no	no	no	yes	no	no	no	no	no
P081	6	3	Hospitalized ICU	yes	no	no	no	yes	no	no	no	no	no
P082	0	0	Hospitalized ICU	yes	yes	no	yes	yes	no	yes	yes	no	no
P082	2	1	Hospitalized ICU	yes	yes	no	no	no	no	no	no	no	no
P082	3	2	Hospitalized ICU	yes	yes	no	no	no	no	no	no	no	no
P082	6	3	Hospitalized ICU	no	no	no	no	no	no	no	no	no	no
P083	0	0	Outpatient	yes	no	yes	no	no	no	yes	yes	yes	no
P083	2	1	Outpatient	yes	no	no	no	no	no	no	yes	no	no
P083	3	2	Outpatient	no	no	no	no	no	no	no	no	no	no
P083	6	3	Outpatient	no	no	no	no	no	no	no	no	no	no
P084	0	0	Hospitalized ICU	yes	no	yes	yes	no	yes	yes	no	no	no
P084	2	1	Hospitalized ICU	yes	yes	no	no	no	no	no	no	no	no
P084	3	2	Hospitalized ICU	yes	no	yes	no	no	no	no	no	no	no
P084	6	3	Hospitalized ICU	yes	no	no	no	no	no	no	yes	no	no
P085	0	0	Outpatient	yes	yes	yes	no	yes	no	yes	yes	yes	yes
P085	2	1	Outpatient	yes	yes	yes	no	yes	no	yes	yes	yes	yes
P085	3	2	Outpatient	yes	yes	no	no	yes	no	yes	yes	yes	yes
P085	6	3	Outpatient	no	no			no					no
P086	0	0	Hospitalized	yes	no	yes	yes	yes	yes	yes	yes	no	yes
P086	2	1	Hospitalized	yes	yes	no	no	no	no	no	no	no	no
P086	3	2	Hospitalized	no	no	no	no	no	no	no	no	no	no
P086	6	3	Hospitalized	no	no	no	no	no	no	no	no	no	no
P087	0	0	Hospitalized	yes	no	yes	yes	yes	yes	yes	yes	yes	no
P087	2	1	Hospitalized	yes	yes	no	no	no	yes	no	yes	no	no
P087	3	2	Hospitalized	yes	no	no	no	no	yes	no	yes	no	no
P087	6	3	Hospitalized	no	no			no					no
P088	0	0	Hospitalized	yes	no	yes	no	yes	no	yes	no	yes	no
P088	2	1	Hospitalized	yes	yes	no	no	no	no	no	no	no	no
P088	3	2	Hospitalized	no	no	no	no	no	no	no	no	no	no
P088	6	3	Hospitalized	no	no	no	no	no	no	no	no	no	no
P089	0	0	Hospitalized ICU	yes	yes	no	yes	yes	yes	yes	no	no	no
P089	2	1	Hospitalized ICU	yes	yes	no	no	no	no	yes	no	no	no
P089	3	2	Hospitalized ICU	yes	no	no	no	no	no	yes	no	no	no
P089	6	3	Hospitalized ICU	no	no	no	no	no	no	no	no	no	no
P090	0	0	Hospitalized oxygen therapy	yes	no	yes	yes	yes	yes	yes	yes	no	no
P090	2	1	Hospitalized oxygen therapy	yes	yes	no	no	no	yes	no	yes	no	no
P090	3	2	Hospitalized oxygen therapy	yes	no	no	no	no	no	no	yes	no	no
P090	6	3	Hospitalized oxygen therapy	yes	no	no	no	no	no	no	yes	no	no
P091	0	0	Outpatient	yes	no	no	yes	yes	yes	yes	no	yes	no
P091	2	1	Outpatient	no	no	no	no	no	no	no	no	no	no
P091	3	2	Outpatient	no	no	no	no	no	no	no	no	no	no
P091	6	3	Outpatient	no	no	no	no	no	no	no	no	no	no
P092	0	0	Outpatient	yes	no	no	yes	yes	no	yes	no	yes	yes
P092	2	1	Outpatient	yes	yes	no	no	no	no	no	no	no	no
P092	3	2	Outpatient	yes	yes	no	no	no	no	no	no	no	no
P092	6	3	Outpatient	no	no	no	no	no	no	no	no	no	no
P093	0	0	Outpatient	yes	yes	no	yes	no	no	yes	yes	yes	no
P093	2	1	Outpatient	yes	yes	no	yes	no	no	yes	yes	no	no
P093	3	2	Outpatient	no	no	no	no	no	no	no	no	no	no
P093	6	3	Outpatient	no	no	no	no	no	no	no	no	no	no
P094	0	0	Hospitalized ICU	yes	yes	no	yes	yes	yes	yes	yes	no	no
P094	2	1	Hospitalized ICU	yes	no	no	no	no	no	yes	yes	no	no
P094	3	2	Hospitalized ICU	yes	yes	no	no	no	no	yes	no	no	no
P094	6	3	Hospitalized ICU	no	no	no	no	no	no	no	no	no	no
P095	0	0	Hospitalized	yes	yes	no	no	no	yes	yes	no	yes	no
P095	2	1	Hospitalized	yes	yes	no	no	no	no	yes	no	no	no
P095	3	2	Hospitalized	yes	yes	no	no	yes	no	yes	no	no	no
P095	6	3	Hospitalized	yes	yes	no	no	yes	yes	yes	no	no	no
P096	0	0	Hospitalized oxygen therapy	yes	no	no	yes	yes	no	no	yes	no	no
P096	2	1	Hospitalized oxygen therapy	no	no	no	no	no	no	no	no	no	no
P096	3	2	Hospitalized oxygen therapy	no	no	no	no	no	no	no	no	no	no
P096	6	3	Hospitalized oxygen therapy	no	no			no					no
P097	0	0	Hospitalized	yes	yes	yes	no	yes	yes	yes	yes	yes	yes
P097	2	1	Hospitalized	yes	yes	no	no	yes	yes	yes	yes	no	no
P097	3	2	Hospitalized	yes	yes	no	no	yes	yes	yes	yes	no	no
P097	6	3	Hospitalized	yes	yes	no	no	no	no	no	yes	no	no
P098	0	0	Hospitalized	yes	no	no	no	yes	no	yes	no	yes	no
P098	2	1	Hospitalized	yes	yes	no	no	no	no	no	no	no	no
P098	3	2	Hospitalized	yes	no	no	no	no	no	no	no	yes	no
P098	6	3	Hospitalized	no	no	no	no	no	no	no	no	no	no
P099	0	0	Hospitalized	yes	yes	yes	yes	yes	no	yes	no	yes	yes
P099	2	1	Hospitalized	yes	yes	no	no	no	no	yes	no	yes	no
P099	3	2	Hospitalized	yes	yes	no	no	no	no	yes	no	no	no
P099	6	3	Hospitalized	yes	yes	yes	no	no	no	no	no	no	no
P100	0	0	Hospitalized	no	no	no	no	no	no	no	no	no	no
P100	2	1	Hospitalized	no	no	no	no	no	no	no	no	no	no
P100	3	2	Hospitalized	no	no	no	no	no	no	no	no	no	no
P100	6	3	Hospitalized	no	no	no	no	no	no	no	no	no	no
P101	0	0	Hospitalized oxygen therapy	yes	no	no	yes	yes	no	yes	no	no	no
P101	2	1	Hospitalized oxygen therapy	yes	no	no	no	no	no	yes	no	no	no
P101	3	2	Hospitalized oxygen therapy	no
P101	6	3	Hospitalized oxygen therapy	no	no			no					no
P102	0	0	Hospitalized	yes	yes	yes	yes	yes	yes	yes	yes	yes	yes
P102	2	1	Hospitalized	yes	yes	no	no	no	yes	yes	yes	yes	yes
P102	3	2	Hospitalized	yes	yes	yes	no	no	no	yes	no	yes	no
P102	6	3	Hospitalized	yes	yes	no	no	yes	yes	yes	yes	yes	no
P103	0	0	Hospitalized ICU	yes	yes	yes	yes	yes	yes	yes	yes	no	no
P103	2	1	Hospitalized ICU	yes	yes	no	no	no	no	yes	no	no	no
P103	3	2	Hospitalized ICU	yes	yes	no	no	yes	no	yes	yes	yes	no
P103	6	3	Hospitalized ICU	yes	no	no	no	yes	no	no	no	no	no
P104	0	0	Hospitalized oxygen therapy	yes	no	yes	yes	yes	no	yes	no	yes	no
P104	2	1	Hospitalized oxygen therapy	yes	no	no	no	no	yes	yes	yes	no	no
P104	3	2	Hospitalized oxygen therapy	yes	no	no	no	no	yes	no	yes	no	no
P104	6	3	Hospitalized oxygen therapy	yes	no	no	no	no	yes	no	yes	yes	no
P105	0	0	Outpatient	yes	yes	yes	yes	yes	yes	yes	yes	yes	yes
P105	2	1	Outpatient	yes	yes	yes	no	yes	no	yes	yes	yes	no
P105	3	2	Outpatient	yes	no	yes	no	yes	no	yes	yes	yes	no
P105	6	3	Outpatient	yes	yes	yes	no	yes	no	yes	yes	yes	yes
P106	0	0	Outpatient	yes	yes	yes	yes	yes	yes	yes	yes	yes	no
P106	2	1	Outpatient	yes	yes	no	no	yes	no	yes	yes	yes	no
P106	3	2	Outpatient	yes	no	yes	no	yes	no	yes	yes	yes	no
P106	6	3	Outpatient	yes	no	yes	no	yes	yes	no	yes	no	no
P107	0	0	Hospitalized ICU	yes	yes	yes	yes	yes	yes	yes	yes	no	yes
P107	2	1	Hospitalized ICU	yes	no	no	no	yes	no	no	yes	no	no
P107	3	2	Hospitalized ICU	yes	no	no	no	yes	no	no	yes	no	no
P107	6	3	Hospitalized ICU	yes	no	no	no	no	no	yes	yes	no	no
P108	0	0	Hospitalized ICU	yes	yes	yes	yes	no	no	yes	no	yes	no
P108	2	1	Hospitalized ICU	yes	yes	no	no	no	no	yes	no	no	no
P108	3	2	Hospitalized ICU	yes	no	no	no	no	no	yes	no	yes	no
P108	6	3	Hospitalized ICU	yes	no	no	no	no	no	yes	no	no	no
P109	0	0	Outpatient	yes	yes	yes	no	yes	no	yes	no	yes	no
P109	2	1	Outpatient	yes	yes	no	no	yes	no	yes	no	no	no
P109	3	2	Outpatient	yes	yes	no	no	no	no	yes	no	yes	no
P109	6	3	Outpatient	yes	no	yes	no	no	no	no	no	no	no
P110	0	0	Hospitalized ICU	yes	no	no	yes	yes	no	yes	yes	no	no
P110	2	1	Hospitalized ICU	yes	yes	yes	no	yes	no	yes	no	no	no
P110	3	2	Hospitalized ICU	yes	no	yes	no	no	no	yes	no	no	no
P110	6	3	Hospitalized ICU	yes	yes	no	no	no	no	yes	yes	no	no
P111	0	0	Hospitalized ICU	yes	yes	yes	yes	yes	yes	no	no	no	yes
P111	2	1	Hospitalized ICU	yes	yes	no	no	no	no	yes	no	yes	no
P111	3	2	Hospitalized ICU	yes	no	no	no	no	no	yes	no	yes	no
P111	6	3	Hospitalized ICU	yes	yes	no	no	yes	no	yes	yes	no	no
P112	0	0	Hospitalized	yes	yes	no	no	yes	yes	yes	no	yes	no
P112	2	1	Hospitalized	no	no	no	no	no	no	no	no	no	no
P112	3	2	Hospitalized	no	no	no	no	no	no	no	no	no	no
P112	6	3	Hospitalized	yes	yes	no	no	no	no	no	no	no	no
P114	0	0	Hospitalized ICU	yes	yes	yes	yes	yes	yes	yes	no	no	yes
P114	2	1	Hospitalized ICU	yes	yes	no	no	yes	no	yes	no	no	no
P114	3	2	Hospitalized ICU	yes	no	no	no	yes	no	yes	no	no	yes
P114	6	3	Hospitalized ICU	no	no			no					no
P115	0	0	Hospitalized ICU	yes	no	yes	no	no	no	yes	yes	yes	no
P115	2	1	Hospitalized ICU	yes	no	no	no	no	no	yes	yes	no	no
P115	3	2	Hospitalized ICU	no
P115	6	3	Hospitalized ICU	no	no			no					no
P116	0	0	Hospitalized ICU	yes	yes	yes	yes	yes	yes	yes	no	yes	no
P116	2	1	Hospitalized ICU	yes	yes	yes	no	yes	yes	yes	no	no	no
P116	3	2	Hospitalized ICU	yes	no	yes	no	yes	yes	yes	no	no	no
P116	6	3	Hospitalized ICU	yes	yes	yes	no	no	no	yes	no	yes	no
P117	0	0	Hospitalized ICU	yes	yes	yes	yes	yes	no	yes	no	yes	no
P117	2	1	Hospitalized ICU	yes	yes	no	no	yes	no	yes	yes	yes	no
P117	3	2	Hospitalized ICU	yes	yes	no	no	yes	no	yes	yes	yes	no
P117	6	3	Hospitalized ICU	yes	yes	no	no	yes	no	yes	yes	no	no
P118	0	0	Hospitalized ICU	yes	yes	yes	yes	no	no	yes	no	yes	no
P118	2	1	Hospitalized ICU	yes	yes	no	no	no	no	no	yes	yes	no
P118	3	2	Hospitalized ICU	yes	yes	no	no	no	no	no	yes	yes	no
P118	6	3	Hospitalized ICU	yes	no	no	no	no	no	yes	no	no	no
P119	0	0	Hospitalized	yes	yes	yes	yes	yes	no	yes	yes	yes	yes
P119	2	1	Hospitalized	no	no	no	no	no	no	no	no	no	no
P119	3	2	Hospitalized	no	no	no	no	no	no	no	no	no	no
P119	6	3	Hospitalized	no	no	no	no	no	no	no	no	no	no
P120	0	0	Outpatient	yes	yes	yes	no	no	no	yes	no	no	no
P120	2	1	Outpatient	yes	yes	no	no	no	no	no	no	no	no
P120	3	2	Outpatient	yes	yes	no	no	no	no	no	no	no	no
P120	6	3	Outpatient	no	no	no	no	no	no	no	no	no	no
P121	0	0	Hospitalized ICU	yes	no	yes	yes	yes	yes	yes	yes	yes	no
P121	2	1	Hospitalized ICU	yes	no	no	no	no	no	yes	no	yes	no
P121	3	2	Hospitalized ICU	yes	no	no	no	no	no	yes	no	yes	no
P121	6	3	Hospitalized ICU	yes	no	no	no	no	no	yes	no	no	no
P122	0	0	Outpatient	yes	no	yes	yes	yes	yes	yes	yes	yes	no
P122	2	1	Outpatient	yes	no	no	no	no	no	no	yes	no	no
P122	3	2	Outpatient	yes	no	no	no	no	yes	no	yes	no	no
P122	6	3	Outpatient	no	no	no	no	no	no	no	no	no	no
P123	0	0	Hospitalized oxygen therapy	yes	yes	yes	no	yes	yes	yes	yes	no	no
P123	2	1	Hospitalized oxygen therapy	yes	yes	yes	no	yes	yes	yes	yes	no	no
P123	3	2	Hospitalized oxygen therapy	yes	yes	yes	no	yes	yes	yes	yes	no	no
P123	6	3	Hospitalized oxygen therapy	yes	yes	yes	no	no	no	yes	no	no	no
P124	0	0	Hospitalized ICU	yes	yes	no	yes	yes	no	yes	yes	yes	yes
P124	2	1	Hospitalized ICU	yes	yes	yes	no	no	no	yes	yes	yes	no
P124	3	2	Hospitalized ICU	yes	no	no	no	no	no	no	yes	yes	no
P124	6	3	Hospitalized ICU	no	no			no
P125	0	0	Hospitalized	yes	yes	no	no	no	yes	yes	no	yes	no
P125	2	1	Hospitalized	yes	no	no	no	no	yes	no	no	no	no
P125	3	2	Hospitalized	yes	no	no	no	no	yes	no	no	no	no
P125	6	3	Hospitalized	no	no			no
P126	0	0	Hospitalized oxygen therapy	yes	yes	no	yes	no	no	yes	no	no	no
P126	2	1	Hospitalized oxygen therapy	no	no	no	no	no	no	no	no	no	no
P126	3	2	Hospitalized oxygen therapy	no	no	no	no	no	no	no	no	no	no
P126	6	3	Hospitalized oxygen therapy	no	no			no
P127	0	0	Hospitalized ICU	yes	yes	yes	yes	yes	no	yes	yes	yes	no
P127	2	1	Hospitalized ICU	yes	yes	no	no	no	no	yes	no	no	no
P127	3	2	Hospitalized ICU	yes	yes	no	no	no	no	yes	no	no	no
P127	6	3	Hospitalized ICU	no	no			no
P128	0	0	Hospitalized ICU	yes	yes	yes	no	no	no	yes	yes	yes	no
P128	2	1	Hospitalized ICU	yes	yes	no	no	no	no	yes	no	yes	no
P128	3	2	Hospitalized ICU	yes	no	no	no	no	no	yes	no	yes	no
P128	6	3	Hospitalized ICU	no	no			no
P129	0	0	Hospitalized ICU	yes	yes	no	yes	yes	yes	yes	yes	yes	yes
P129	2	1	Hospitalized ICU	yes	no	no	no	yes	no	yes	yes	yes	no
P129	3	2	Hospitalized ICU	yes	no	no	no	yes	no	yes	yes	yes	no
P129	6	3	Hospitalized ICU	yes	no	no	no	no	no	yes	no	no	no
P130	0	0	Outpatient	yes	yes	yes	yes	yes	yes	yes		no	no
P130	2	1	Outpatient	yes	yes	yes	no	no	yes	yes	no	no	no
P130	3	2	Outpatient	yes	yes	yes	no	no	yes	yes	no	no	no
P130	6	3	Outpatient	yes	yes	yes	no	no	yes	yes	no	no	no
P131	0	0	Hospitalized ICU	yes	no	yes	yes	yes	no	yes	yes	no	yes
P131	2	1	Hospitalized ICU	yes	yes	no	no	no	no	no	no	no	no
P131	3	2	Hospitalized ICU	no
P131	6	3	Hospitalized ICU	no	no	no	no	no	no	no	no	no	no
P132	0	0	Hospitalized ICU	yes	yes	yes	no	yes	no	yes	yes	yes	no
P132	2	1	Hospitalized ICU	yes	yes	yes	no	no	no	yes	yes	yes	no
P132	3	2	Hospitalized ICU	no
P132	6	3	Hospitalized ICU	yes	no	yes	no	no	no	yes	yes	no	no
P133	0	0	Hospitalized ICU	yes	yes	yes	yes	yes	yes	yes	no	no	no
P133	2	1	Hospitalized ICU	yes	yes	no	no	no	yes	yes	yes	no	no
P133	3	2	Hospitalized ICU	yes	yes	no	no	no	yes	yes	yes	no	no
P133	6	3	Hospitalized ICU	yes	no	no	no	no	no	yes	yes	no	no
P134	0	0	Hospitalized oxygen therapy	yes	no	no	no	no	no	no	no	yes	no
P134	2	1	Hospitalized oxygen therapy	yes	no	no	no	no	no	no	yes	no	no
P134	3	2	Hospitalized oxygen therapy	no
P134	6	3	Hospitalized oxygen therapy	no	no			no					no
P135	0	0	Hospitalized ICU	yes	yes	no	yes	no	no	yes	yes	no	yes
P135	2	1	Hospitalized ICU	yes	no	yes	no	no	no	yes	yes	yes	no
P135	3	2	Hospitalized ICU	no
P135	6	3	Hospitalized ICU	yes	no	yes	no	no	no	yes	yes	no	no
P136	0	0	Outpatient	yes	yes	yes	no	yes	no	yes	no	yes	yes
P136	2	1	Outpatient	yes	no	yes	no	no	no	yes	yes	yes	no
P136	3	2	Outpatient	yes	no	yes	no	no	no	yes	yes	yes	no
P136	6	3	Outpatient	yes	yes	yes	no	yes	no	yes	no	no	no
P137	0	0	Outpatient	yes	yes	no	yes	yes	yes	yes	yes	yes	yes
P137	2	1	Outpatient	yes	yes	yes	no	yes	no	yes	no	yes	no
P137	3	2	Outpatient	yes	yes	yes	no	yes	no	yes	no	yes	no
P137	6	3	Outpatient	no	no			no					no
P138	0	0	Outpatient	yes	yes	yes	no	yes	no	yes	yes	yes	no
P138	2	1	Outpatient	yes	yes	no	no	yes	no	yes	yes	no	no
P138	3	2	Outpatient	yes	yes	no	no	yes	no	yes	yes	no	no
P138	6	3	Outpatient	yes	no	no	no	no	no	yes	no	no	no
P139	0	0	Hospitalized oxygen therapy	yes	yes	yes	yes	no	no	yes	yes	yes	no
P139	2	1	Hospitalized oxygen therapy	yes	no	no	no	no	no	yes	yes	no	no
P139	3	2	Hospitalized oxygen therapy	yes	no	no	no	no	no	yes	yes	no	no
P139	6	3	Hospitalized oxygen therapy	yes	yes	no	no	yes	no	yes	yes	no	no
P140	0	0	Outpatient	yes	yes	yes	yes	yes	no	yes	yes	yes	yes
P140	2	1	Outpatient	yes	yes	no	no	yes	no	yes	no	no	no
P140	3	2	Outpatient	yes	yes	no	no	yes	no	yes	yes	no	no
P140	6	3	Outpatient	yes	yes	no	no	no	no	yes	no	no	no
P141	0	0	Hospitalized	yes	yes	no	no	no	yes	yes	no	no	no
P141	2	1	Hospitalized	yes	no	no	no	no	no	yes	no	no	no
P141	3	2	Hospitalized	yes	no	no	no	no	no	yes	no	no	no
P141	6	3	Hospitalized	yes	yes	no	no	no	no	yes	no	no	no
P142	0	0	Outpatient	yes	no	yes	no	no	yes	yes	yes	yes	yes
P142	2	1	Outpatient	yes	no	no	no	no	yes	no	yes	yes	yes
P142	3	2	Outpatient	yes	no	no	no	no	yes	no	yes	yes	no
P142	6	3	Outpatient	no	no			no					no
P143	0	0	Outpatient	yes	no	yes	yes	yes	yes	yes	no	yes	yes
P143	2	1	Outpatient	no	no	no	no	no	no	no	no	no	no
P143	3	2	Outpatient	no
P143	6	3	Outpatient	no	no	no	no	no	no	no	no	no	no
P144	0	0	Outpatient	yes	no	no	yes	yes	no	yes	yes	yes	no
P144	2	1	Outpatient	no	no	no	no	no	no	no	no	no	no
P144	3	2	Outpatient	no	no	no	no	no	no	no	no	no	no
P144	6	3	Outpatient	no	no	no	no	no	no	no	no	no	no
P145	0	0	Outpatient	yes	no	yes	yes	yes	yes	yes	yes	yes	yes
P145	2	1	Outpatient	yes	no	no	no	no	no	yes	no	no	no
P145	3	2	Outpatient	no
P145	6	3	Outpatient	yes	no	no	no	yes	no	no	yes	no	no
P146	0	0	Outpatient	yes	yes	yes	yes	yes	yes	yes	yes	yes	yes
P146	2	1	Outpatient	yes	yes	yes	no	yes	no	yes	no	yes	no
P146	3	2	Outpatient	no
P146	6	3	Outpatient	yes	no	no	no	yes	no	yes	yes	no	no

## Sheet: figure 3 source data 1
ID	Follow-up. months	Severity	CT abnormalities	CT sev. score 1 - 5	CT sev. score over 5	LF impaired	CT abnormality grading
P001	2	Hospitalized	yes	yes	no	yes	1-5 pt
P001	3	Hospitalized	no	no	no	yes	absent
P001	6	Hospitalized	no	no	no	yes	absent
P002	2	Hospitalized oxygen therapy	yes	yes	no	no	1-5 pt
P002	3	Hospitalized oxygen therapy	yes	yes	no	no	1-5 pt
P002	6	Hospitalized oxygen therapy	yes	yes	no	yes	1-5 pt
P003	2	Hospitalized oxygen therapy	yes	no	yes	no	>5 pt
P003	3	Hospitalized oxygen therapy	yes	yes	no	no	1-5 pt
P003	6	Hospitalized oxygen therapy	yes	yes	no	no	1-5 pt
P004	2	Outpatient	yes	yes	no	no	1-5 pt
P004	3	Outpatient	yes	yes	no	no	1-5 pt
P004	6	Outpatient	no	no	no	no	absent
P005	2	Hospitalized	yes	yes	no	yes	1-5 pt
P005	3	Hospitalized	yes	yes	no	yes	1-5 pt
P005	6	Hospitalized	yes	yes	no	yes	1-5 pt
P006	2	Outpatient	no	no	no	no	absent
P006	3	Outpatient	no	no	no	no	absent
P006	6	Outpatient	no	no	no	no	absent
P007	2	Hospitalized	yes	no	yes	no	>5 pt
P007	3	Hospitalized	yes	yes	no	yes	1-5 pt
P007	6	Hospitalized	yes	yes	no	yes	1-5 pt
P008	2	Outpatient	yes	no	yes	yes	>5 pt
P008	3	Outpatient	yes	no	yes	yes	>5 pt
P008	6	Outpatient	yes	yes	no	yes	1-5 pt
P009	2	Outpatient	no	no	no	no	absent
P009	3	Outpatient	no	no	no	no	absent
P009	6	Outpatient	no	no	no	no	absent
P011	2	Hospitalized	yes	no	yes		>5 pt
P011	3	Hospitalized	no	no	no		absent
P011	6	Hospitalized	no	no	no		absent
P012	2	Hospitalized	no	no	no		absent
P012	3	Hospitalized	yes	yes	no		1-5 pt
P012	6	Hospitalized	no	no	no		absent
P013	2	Hospitalized oxygen therapy	yes	no	yes	yes	>5 pt
P013	3	Hospitalized oxygen therapy	yes	no	yes	yes	>5 pt
P013	6	Hospitalized oxygen therapy	yes	no	yes	yes	>5 pt
P014	2	Hospitalized	yes	yes	no	yes	1-5 pt
P014	3	Hospitalized	no	no	no	yes	absent
P014	6	Hospitalized	no	no	no	yes	absent
P015	2	Hospitalized oxygen therapy	yes	yes	no	yes	1-5 pt
P015	3	Hospitalized oxygen therapy	no	no	no	yes	absent
P015	6	Hospitalized oxygen therapy	no	no	no	no	absent
P017	2	Hospitalized	no	no	no	no	absent
P017	3	Hospitalized	yes	yes	no	no	1-5 pt
P017	6	Hospitalized	no	no	no	no	absent
P018	2	Hospitalized	yes	no	yes	yes	>5 pt
P018	3	Hospitalized	yes	no	yes	no	>5 pt
P018	6	Hospitalized	yes	yes	no	no	1-5 pt
P019	2	Hospitalized	no	no	no	no	absent
P019	3	Hospitalized	no	no	no	no	absent
P019	6	Hospitalized	no	no	no	no	absent
P020	2	Hospitalized oxygen therapy	no	no	no	no	absent
P020	3	Hospitalized oxygen therapy	no	no	no	no	absent
P020	6	Hospitalized oxygen therapy	no	no	no	no	absent
P021	2	Outpatient	yes	no	yes	no	>5 pt
P021	3	Outpatient	yes	yes	no	no	1-5 pt
P021	6	Outpatient	yes	yes	no	no	1-5 pt
P022	2	Hospitalized ICU	yes	no	yes	no	>5 pt
P022	3	Hospitalized ICU	yes	yes	no	no	1-5 pt
P022	6	Hospitalized ICU	yes	yes	no	no	1-5 pt
P024	2	Hospitalized oxygen therapy	yes	yes	no	yes	1-5 pt
P024	3	Hospitalized oxygen therapy	yes	yes	no	yes	1-5 pt
P024	6	Hospitalized oxygen therapy	no	no	no	no	absent
P025	2	Hospitalized oxygen therapy	yes	no	yes	yes	>5 pt
P025	3	Hospitalized oxygen therapy	yes	no	yes	no	>5 pt
P025	6	Hospitalized oxygen therapy	yes	no	yes	no	>5 pt
P026	2	Hospitalized oxygen therapy	yes	no	yes	no	>5 pt
P026	3	Hospitalized oxygen therapy	yes	yes	no	no	1-5 pt
P026	6	Hospitalized oxygen therapy	yes	yes	no	no	1-5 pt
P027	2	Hospitalized	yes	no	yes	no	>5 pt
P027	3	Hospitalized	yes	no	yes	yes	>5 pt
P027	6	Hospitalized	yes	no	yes	no	>5 pt
P028	2	Outpatient	no	no	no	no	absent
P028	3	Outpatient	no	no	no	no	absent
P028	6	Outpatient	no	no	no	no	absent
P029	2	Hospitalized	yes	no	yes	no	>5 pt
P029	3	Hospitalized	yes	yes	no	no	1-5 pt
P029	6	Hospitalized	yes	yes	no	no	1-5 pt
P030	2	Hospitalized	yes	no	yes	no	>5 pt
P030	3	Hospitalized	yes	yes	no	no	1-5 pt
P030	6	Hospitalized	yes	yes	no	no	1-5 pt
P031	2	Hospitalized	yes	yes	no	yes	1-5 pt
P031	3	Hospitalized	no	no	no	yes	absent
P031	6	Hospitalized	no	no	no	yes	absent
P032	2	Hospitalized oxygen therapy	yes	no	yes	yes	>5 pt
P032	3	Hospitalized oxygen therapy	yes	yes	no	yes	1-5 pt
P032	6	Hospitalized oxygen therapy	yes	yes	no	yes	1-5 pt
P033	2	Outpatient	no	no	no	no	absent
P033	3	Outpatient	no	no	no	no	absent
P033	6	Outpatient	no	no	no	no	absent
P034	2	Hospitalized oxygen therapy	yes	no	yes		>5 pt
P034	3	Hospitalized oxygen therapy	no	no	no		absent
P034	6	Hospitalized oxygen therapy	no	no	no		absent
P035	2	Hospitalized oxygen therapy	yes	no	yes	no	>5 pt
P035	3	Hospitalized oxygen therapy	no	no	no	no	absent
P035	6	Hospitalized oxygen therapy	no	no	no	no	absent
P036	2	Outpatient	no	no	no	no	absent
P036	3	Outpatient	no	no	no	no	absent
P036	6	Outpatient	no	no	no	no	absent
P038	2	Hospitalized oxygen therapy	yes	yes	no	no	1-5 pt
P038	3	Hospitalized oxygen therapy	yes	yes	no	no	1-5 pt
P038	6	Hospitalized oxygen therapy	no	no	no	no	absent
P039	2	Hospitalized oxygen therapy	yes	no	yes	no	>5 pt
P039	3	Hospitalized oxygen therapy	yes	yes	no	no	1-5 pt
P039	6	Hospitalized oxygen therapy	no	no	no	no	absent
P040	2	Hospitalized oxygen therapy	yes	yes	no	no	1-5 pt
P040	3	Hospitalized oxygen therapy	yes	yes	no	no	1-5 pt
P040	6	Hospitalized oxygen therapy	yes	yes	no	no	1-5 pt
P041	2	Hospitalized oxygen therapy	yes	no	yes	no	>5 pt
P041	3	Hospitalized oxygen therapy	no	no	no	no	absent
P041	6	Hospitalized oxygen therapy	no	no	no	no	absent
P042	2	Hospitalized	yes	yes	no	no	1-5 pt
P042	3	Hospitalized	no	no	no	no	absent
P042	6	Hospitalized	no	no	no	no	absent
P043	2	Outpatient	no	no	no	no	absent
P043	3	Outpatient	no	no	no	no	absent
P043	6	Outpatient	no	no	no	no	absent
P045	2	Hospitalized oxygen therapy	yes	yes	no	yes	1-5 pt
P045	3	Hospitalized oxygen therapy	no	no	no	no	absent
P045	6	Hospitalized oxygen therapy	no	no	no	yes	absent
P046	2	Hospitalized	no	no	no	no	absent
P046	3	Hospitalized	yes	yes	no	no	1-5 pt
P046	6	Hospitalized	yes	no	yes	yes	>5 pt
P047	2	Hospitalized	yes	yes	no	no	1-5 pt
P047	3	Hospitalized	no	no	no	no	absent
P047	6	Hospitalized	no	no	no	no	absent
P048	2	Hospitalized oxygen therapy	yes	no	yes	yes	>5 pt
P048	3	Hospitalized oxygen therapy	yes	no	yes	yes	>5 pt
P048	6	Hospitalized oxygen therapy	yes	no	yes	yes	>5 pt
P049	2	Hospitalized oxygen therapy	yes	no	yes	yes	>5 pt
P049	3	Hospitalized oxygen therapy	yes	yes	no	yes	1-5 pt
P049	6	Hospitalized oxygen therapy	yes	yes	no	yes	1-5 pt
P050	2	Outpatient	yes	yes	no	no	1-5 pt
P050	3	Outpatient	yes	yes	no	no	1-5 pt
P050	6	Outpatient	no	no	no	no	absent
P051	2	Hospitalized oxygen therapy	yes	yes	no	no	1-5 pt
P051	3	Hospitalized oxygen therapy	yes	yes	no	no	1-5 pt
P051	6	Hospitalized oxygen therapy	yes	yes	no	no	1-5 pt
P052	2	Hospitalized	yes	no	yes	no	>5 pt
P052	3	Hospitalized	yes	no	yes	no	>5 pt
P052	6	Hospitalized	yes	no	yes	yes	>5 pt
P053	2	Hospitalized oxygen therapy	yes	no	yes	no	>5 pt
P053	3	Hospitalized oxygen therapy	yes	yes	no	no	1-5 pt
P053	6	Hospitalized oxygen therapy	yes	yes	no	yes	1-5 pt
P054	2	Hospitalized oxygen therapy	no	no	no		absent
P054	3	Hospitalized oxygen therapy	no	no	no		absent
P054	6	Hospitalized oxygen therapy	no	no	no		absent
P055	2	Hospitalized	yes	no	yes	no	>5 pt
P055	3	Hospitalized	yes	yes	no	no	1-5 pt
P055	6	Hospitalized	yes	yes	no	no	1-5 pt
P057	2	Outpatient	no	no	no	no	absent
P057	3	Outpatient	no	no	no	yes	absent
P057	6	Outpatient	no	no	no	yes	absent
P058	2	Hospitalized ICU	yes	yes	no	no	1-5 pt
P058	3	Hospitalized ICU	no	no	no	no	absent
P058	6	Hospitalized ICU	no	no	no	no	absent
P059	2	Outpatient	yes	yes	no	yes	1-5 pt
P059	3	Outpatient	yes	yes	no	yes	1-5 pt
P059	6	Outpatient	yes	yes	no	no	1-5 pt
P060	2	Hospitalized	yes	no	yes	no	>5 pt
P060	3	Hospitalized	yes	yes	no	no	1-5 pt
P060	6	Hospitalized	yes	yes	no	no	1-5 pt
P061	2	Hospitalized	no	no	no	yes	absent
P061	3	Hospitalized	no	no	no	yes	absent
P061	6	Hospitalized	no	no	no	no	absent
P062	2	Outpatient	no	no	no	no	absent
P062	3	Outpatient	no	no	no	no	absent
P062	6	Outpatient	no	no	no	no	absent
P064	2	Outpatient	no	no	no	yes	absent
P064	3	Outpatient	no	no	no	yes	absent
P064	6	Outpatient	no	no	no	yes	absent
P065	2	Hospitalized oxygen therapy	yes	no	yes	yes	>5 pt
P065	3	Hospitalized oxygen therapy	yes	no	yes	yes	>5 pt
P065	6	Hospitalized oxygen therapy	yes	no	yes	no	>5 pt
P066	2	Hospitalized oxygen therapy	yes	no	yes	yes	>5 pt
P066	3	Hospitalized oxygen therapy	yes	no	yes	yes	>5 pt
P066	6	Hospitalized oxygen therapy	yes	no	yes	yes	>5 pt
P068	2	Outpatient	no	no	no	no	absent
P068	3	Outpatient	no	no	no	no	absent
P068	6	Outpatient	no	no	no	no	absent
P069	2	Hospitalized oxygen therapy	no	no	no		absent
P069	3	Hospitalized oxygen therapy	no	no	no		absent
P069	6	Hospitalized oxygen therapy	no	no	no		absent
P070	2	Hospitalized oxygen therapy	yes	no	yes	no	>5 pt
P070	3	Hospitalized oxygen therapy	yes	yes	no	no	1-5 pt
P070	6	Hospitalized oxygen therapy	no	no	no	no	absent
P071	2	Hospitalized oxygen therapy	yes	yes	no	no	1-5 pt
P071	3	Hospitalized oxygen therapy	no	no	no	no	absent
P071	6	Hospitalized oxygen therapy	no	no	no	no	absent
P072	2	Hospitalized	yes	no	yes	no	>5 pt
P072	3	Hospitalized	yes	yes	no	no	1-5 pt
P072	6	Hospitalized	yes	yes	no	no	1-5 pt
P074	2	Hospitalized ICU	yes	no	yes	yes	>5 pt
P074	3	Hospitalized ICU	yes	no	yes	yes	>5 pt
P074	6	Hospitalized ICU	yes	no	yes	yes	>5 pt
P075	2	Hospitalized ICU	yes	yes	no	yes	1-5 pt
P075	3	Hospitalized ICU	yes	no	yes	yes	>5 pt
P075	6	Hospitalized ICU	yes	yes	no	yes	1-5 pt
P076	2	Hospitalized oxygen therapy	yes	no	yes	yes	>5 pt
P076	3	Hospitalized oxygen therapy	yes	no	yes	yes	>5 pt
P076	6	Hospitalized oxygen therapy	yes	yes	no	yes	1-5 pt
P077	2	Hospitalized ICU	yes	no	yes	yes	>5 pt
P077	3	Hospitalized ICU	yes	yes	no	yes	1-5 pt
P077	6	Hospitalized ICU	no	no	no	no	absent
P079	2	Hospitalized	yes	yes	no	no	1-5 pt
P079	3	Hospitalized	yes	yes	no	no	1-5 pt
P079	6	Hospitalized	yes	yes	no	no	1-5 pt
P080	2	Hospitalized ICU	yes	no	yes	yes	>5 pt
P080	3	Hospitalized ICU	yes	yes	no	yes	1-5 pt
P080	6	Hospitalized ICU	yes	yes	no	yes	1-5 pt
P081	2	Hospitalized ICU	yes	no	yes	yes	>5 pt
P081	3	Hospitalized ICU	yes	no	yes	yes	>5 pt
P081	6	Hospitalized ICU	yes	no	yes	yes	>5 pt
P082	2	Hospitalized ICU	yes	yes	no	no	1-5 pt
P082	3	Hospitalized ICU	yes	yes	no	no	1-5 pt
P082	6	Hospitalized ICU	yes	yes	no	no	1-5 pt
P083	2	Outpatient	no	no	no	no	absent
P083	3	Outpatient	no	no	no	no	absent
P083	6	Outpatient	no	no	no	no	absent
P084	2	Hospitalized ICU	yes	yes	no	yes	1-5 pt
P084	3	Hospitalized ICU	no	no	no	no	absent
P084	6	Hospitalized ICU	no	no	no	no	absent
P086	2	Hospitalized	yes	no	yes	no	>5 pt
P086	3	Hospitalized	yes	no	yes	no	>5 pt
P086	6	Hospitalized	yes	no	yes	yes	>5 pt
P087	2	Hospitalized	yes	yes	no	no	1-5 pt
P087	3	Hospitalized	no	no	no	no	absent
P087	6	Hospitalized	no	no	no	no	absent
P088	2	Hospitalized	no	no	no	no	absent
P088	3	Hospitalized	no	no	no	no	absent
P088	6	Hospitalized	no	no	no	no	absent
P089	2	Hospitalized ICU	yes	no	yes	yes	>5 pt
P089	3	Hospitalized ICU	yes	no	yes	yes	>5 pt
P089	6	Hospitalized ICU	yes	no	yes	yes	>5 pt
P090	2	Hospitalized oxygen therapy	yes	no	yes	yes	>5 pt
P090	3	Hospitalized oxygen therapy	yes	no	yes	yes	>5 pt
P090	6	Hospitalized oxygen therapy	yes	yes	no	no	1-5 pt
P093	2	Outpatient	no	no	no	no	absent
P093	3	Outpatient	no	no	no	no	absent
P093	6	Outpatient	no	no	no	no	absent
P094	2	Hospitalized ICU	yes	no	yes	yes	>5 pt
P094	3	Hospitalized ICU	yes	no	yes	yes	>5 pt
P094	6	Hospitalized ICU	yes	no	yes	yes	>5 pt
P095	2	Hospitalized	yes	no	yes	yes	>5 pt
P095	3	Hospitalized	yes	no	yes	yes	>5 pt
P095	6	Hospitalized	yes	no	yes	yes	>5 pt
P097	2	Hospitalized	yes	no	yes	no	>5 pt
P097	3	Hospitalized	yes	yes	no	no	1-5 pt
P097	6	Hospitalized	yes	yes	no	no	1-5 pt
P098	2	Hospitalized	yes	no	yes	yes	>5 pt
P098	3	Hospitalized	yes	yes	no	yes	1-5 pt
P098	6	Hospitalized	yes	yes	no	no	1-5 pt
P099	2	Hospitalized	yes	yes	no	no	1-5 pt
P099	3	Hospitalized	yes	yes	no	no	1-5 pt
P099	6	Hospitalized	no	no	no	no	absent
P100	2	Hospitalized	yes	yes	no	no	1-5 pt
P100	3	Hospitalized	no	no	no	no	absent
P100	6	Hospitalized	no	no	no	no	absent
P102	2	Hospitalized	yes	yes	no	no	1-5 pt
P102	3	Hospitalized	no	no	no	no	absent
P102	6	Hospitalized	no	no	no	no	absent
P103	2	Hospitalized ICU	yes	no	yes	yes	>5 pt
P103	3	Hospitalized ICU	yes	no	yes	yes	>5 pt
P103	6	Hospitalized ICU	yes	no	yes	yes	>5 pt
P104	2	Hospitalized oxygen therapy	yes	no	yes	no	>5 pt
P104	3	Hospitalized oxygen therapy	yes	no	yes	yes	>5 pt
P104	6	Hospitalized oxygen therapy	yes	no	yes	no	>5 pt
P105	2	Outpatient	no	no	no	no	absent
P105	3	Outpatient	no	no	no	no	absent
P105	6	Outpatient	no	no	no	no	absent
P106	2	Outpatient	no	no	no	no	absent
P106	3	Outpatient	no	no	no	no	absent
P106	6	Outpatient	no	no	no	no	absent
P107	2	Hospitalized ICU	yes	no	yes	no	>5 pt
P107	3	Hospitalized ICU	yes	no	yes	no	>5 pt
P107	6	Hospitalized ICU	yes	no	yes	no	>5 pt
P108	2	Hospitalized ICU	yes	no	yes	no	>5 pt
P108	3	Hospitalized ICU	no	no	no	no	absent
P108	6	Hospitalized ICU	no	no	no	no	absent
P109	2	Outpatient	yes	no	yes	yes	>5 pt
P109	3	Outpatient	yes	no	yes	no	>5 pt
P109	6	Outpatient	yes	no	yes	no	>5 pt
P111	2	Hospitalized ICU	yes	no	yes	yes	>5 pt
P111	3	Hospitalized ICU	yes	yes	no	no	1-5 pt
P111	6	Hospitalized ICU	yes	yes	no	no	1-5 pt
P112	2	Hospitalized	no	no	no	no	absent
P112	3	Hospitalized	no	no	no	no	absent
P112	6	Hospitalized	no	no	no	no	absent
P116	2	Hospitalized ICU	yes	no	yes	yes	>5 pt
P116	3	Hospitalized ICU	yes	no	yes	yes	>5 pt
P116	6	Hospitalized ICU	yes	no	yes	yes	>5 pt
P122	2	Outpatient	no	no	no	no	absent
P122	3	Outpatient	no	no	no	no	absent
P122	6	Outpatient	no	no	no	no	absent
P123	2	Hospitalized oxygen therapy	yes	no	yes	yes	>5 pt
P123	3	Hospitalized oxygen therapy	yes	yes	no	yes	1-5 pt
P123	6	Hospitalized oxygen therapy	yes	yes	no	yes	1-5 pt
P124	2	Hospitalized ICU	yes	no	yes		>5 pt
P124	3	Hospitalized ICU	yes	no	yes		>5 pt
P124	6	Hospitalized ICU	yes	no	yes		>5 pt
P125	2	Hospitalized	yes	yes	no		1-5 pt
P125	3	Hospitalized	yes	yes	no		1-5 pt
P125	6	Hospitalized	no	no	no		absent
P126	2	Hospitalized oxygen therapy	yes	no	yes		>5 pt
P126	3	Hospitalized oxygen therapy	yes	yes	no		1-5 pt
P126	6	Hospitalized oxygen therapy	no	no	no		absent
P146	2	Outpatient	no	no	no		absent
P146	3	Outpatient	no	no	no		absent
P146	6	Outpatient	no	no	no		absent
P037	2	Hospitalized oxygen therapy				no
P037	3	Hospitalized oxygen therapy				no
P037	6	Hospitalized oxygen therapy				no
P044	2	Hospitalized oxygen therapy				no
P044	3	Hospitalized oxygen therapy				no
P044	6	Hospitalized oxygen therapy				no
P056	2	Hospitalized oxygen therapy				yes
P056	3	Hospitalized oxygen therapy				yes
P056	6	Hospitalized oxygen therapy				yes
P091	2	Outpatient				no
P091	3	Outpatient				no
P091	6	Outpatient				no
P092	2	Outpatient				no
P092	3	Outpatient				no
P092	6	Outpatient				no
P110	2	Hospitalized ICU				yes
P110	3	Hospitalized ICU				yes
P110	6	Hospitalized ICU				yes
P117	2	Hospitalized ICU				no
P117	3	Hospitalized ICU				no
P117	6	Hospitalized ICU				no
P118	2	Hospitalized ICU				yes
P118	3	Hospitalized ICU				yes
P118	6	Hospitalized ICU				yes
P119	2	Hospitalized				yes
P119	3	Hospitalized				yes
P119	6	Hospitalized				yes
P120	2	Outpatient				no
P120	3	Outpatient				no
P120	6	Outpatient				no
P121	2	Hospitalized ICU				yes
P121	3	Hospitalized ICU				no
P121	6	Hospitalized ICU				no
P127	2	Hospitalized ICU				no
P127	3	Hospitalized ICU				no
P127	6	Hospitalized ICU				no
P129	2	Hospitalized ICU				no
P129	3	Hospitalized ICU				no
P129	6	Hospitalized ICU				no
P130	2	Outpatient				no
P130	3	Outpatient				no
P130	6	Outpatient				no
P133	2	Hospitalized ICU				yes
P133	3	Hospitalized ICU				yes
P133	6	Hospitalized ICU				yes
P135	2	Hospitalized ICU				yes
P135	3	Hospitalized ICU				yes
P135	6	Hospitalized ICU				yes
P136	2	Outpatient				yes
P136	3	Outpatient				yes
P136	6	Outpatient				yes
P138	2	Outpatient				no
P138	3	Outpatient				no
P138	6	Outpatient				no
P139	2	Hospitalized oxygen therapy				yes
P139	3	Hospitalized oxygen therapy				yes
P139	6	Hospitalized oxygen therapy				yes
P140	2	Outpatient				no
P140	3	Outpatient				no
P140	6	Outpatient				no
P141	2	Hospitalized				yes
P141	3	Hospitalized				yes
P141	6	Hospitalized				yes
P144	2	Outpatient				no
P144	3	Outpatient				no
P144	6	Outpatient				no

## Sheet: figure 4 and 5 source data 1
Outcome	Co-variate	Baseline	Complete cases	OR	pFDR
CT abnormalities @V3	Male sex, n = 63	no male sex, n = 55	118	3.79 [1.77 - 8.44]	p = 0.01
CT abnormalities @V3	Obesity, n = 22	no obesity, n = 96	118	1.07 [0.415 - 2.72]	ns (p = 0.9)
CT abnormalities @V3	Current smoker, n = 4	no current smoker, n = 114	118	0.412 [0.02 - 3.33]	ns (p = 0.51)
CT abnormalities @V3	Ex-smoker, n = 48	no ex-smoker, n = 70	118	1.5 [0.716 - 3.16]	ns (p = 0.36)
CT abnormalities @V3	CVD, n = 45	no cVD, n = 73	118	3.36 [1.57 - 7.43]	p = 0.012
CT abnormalities @V3	Hypertension, n = 34	no hypertension, n = 84	118	3.97 [1.73 - 9.54]	p = 0.01
CT abnormalities @V3	PD, n = 24	no pD, n = 94	118	2.06 [0.837 - 5.25]	ns (p = 0.2)
CT abnormalities @V3	COPD, n = 6	no cOPD, n = 112	118	2.67 [0.499 - 19.8]	ns (p = 0.34)
CT abnormalities @V3	Asthma, n = 9	no asthma, n = 109	118	1.02 [0.24 - 4.04]	ns (p = 0.99)
CT abnormalities @V3	Metabolic disorders, n = 50	no metabolic disorders, n = 68	118	3.14 [1.48 - 6.81]	p = 0.017
CT abnormalities @V3	Hypercholesterolemia, n = 22	no hypercholesterolemia, n = 96	118	2.67 [1.04 - 7.27]	ns (p = 0.093)
CT abnormalities @V3	Diabetes, n = 18	no diabetes, n = 100	118	4.07 [1.41 - 13.5]	p = 0.041
CT abnormalities @V3	GITD, n = 17	no gITD, n = 101	118	3.66 [1.25 - 12.2]	ns (p = 0.061)
CT abnormalities @V3	Malignancy, n = 13	no malignancy, n = 105	118	19.5 [3.63 - 362]	p = 0.021
CT abnormalities @V3	Immune deficiency, n = 5	no immune deficiency, n = 113	118	1.96 [0.313 - 15.3]	ns (p = 0.53)
CT abnormalities @V3	Weight loss @V0, n = 84	no weight loss @V0, n = 34	118	4.45 [1.83 - 12.1]	p = 0.011
CT abnormalities @V3	Dyspnea @V0, n = 81	no dyspnea @V0, n = 37	118	1.45 [0.661 - 3.27]	ns (p = 0.43)
CT abnormalities @V3	Cough @V0, n = 83	no cough @V0, n = 35	118	1.07 [0.484 - 2.41]	ns (p = 0.89)
CT abnormalities @V3	Fever @V0, n = 83	no fever @V0, n = 35	118	2.56 [1.12 - 6.21]	ns (p = 0.072)
CT abnormalities @V3	Night sweat @V0, n = 74	no night sweat @V0, n = 44	118	1.93 [0.902 - 4.26]	ns (p = 0.17)
CT abnormalities @V3	Pain @V0, n = 65	no pain @V0, n = 53	118	0.339 [0.157 - 0.713]	p = 0.021
CT abnormalities @V3	GI symptoms @V0, n = 47	no gI symptoms @V0, n = 71	118	0.675 [0.316 - 1.42]	ns (p = 0.38)
CT abnormalities @V3	Anosmia @V0, n = 53	no anosmia @V0, n = 65	118	1.09 [0.526 - 2.28]	ns (p = 0.85)
CT abnormalities @V3	Impaired performance @V0, n = 106	no impaired performance @V0, n = 12	118	1.12 [0.335 - 3.98]	ns (p = 0.89)
CT abnormalities @V3	Sleep disorders @V0, n = 40	no sleep disorders @V0, n = 77	117	0.887 [0.407 - 1.91]	ns (p = 0.82)
CT abnormalities @V3	Anti-infectives @V0, n = 64	no anti-infectives @V0, n = 54	118	3.56 [1.67 - 7.9]	p = 0.01
CT abnormalities @V3	Anti-platelet @V0, n = 12	no anti-platelet @V0, n = 106	118	4.4 [1.23 - 20.7]	ns (p = 0.077)
CT abnormalities @V3	Anti-coagulatives @V0, n = 4	no anti-coagulatives @V0, n = 114	118	3.98 [0.493 - 81.8]	ns (p = 0.32)
CT abnormalities @V3	Immunosuppression @V0, n = 20	no immunosuppression @V0, n = 98	118	6.89 [2.32 - 25.5]	p = 0.01
CT abnormalities @V3	Anemia @V1, n = 10	no anemia @V1, n = 108	118	5.82 [1.38 - 39.8]	ns (p = 0.072)
CT abnormalities @V3	Elevated ferritin @V1, n = 20	no elevated ferritin @V1, n = 98	118	2.18 [0.825 - 6.01]	ns (p = 0.2)
CT abnormalities @V3	Elevated NTproBNP @V1, n = 38	no elevated NTproBNP @V1, n = 80	118	2.29 [1.05 - 5.1]	ns (p = 0.084)
CT abnormalities @V3	Elevated D-dimer @V1, n = 49	no elevated D-dimer @V1, n = 69	118	2.9 [1.37 - 6.28]	p = 0.023
CT abnormalities @V3	Elevated CRP @V1, n = 18	no elevated CRP @V1, n = 100	118	5.71 [1.89 - 21.3]	p = 0.019
CT abnormalities @V3	Elevated IL-6 @V1, n = 11	no elevated IL-6 @V1, n = 107	118	15.5 [2.81 - 289]	p = 0.036
CT abnormalities @V3	Iron deficiency @V1, n = 6	no iron deficiency @V1, n = 112	118	0.239 [0.0123 - 1.55]	ns (p = 0.29)
CT abnormalities @V3	Age over 65, n = 32	no age over 65, n = 86	118	2.81 [1.23 - 6.66]	p = 0.045
CT abnormalities @V3	Hospitalized >7 days @V0, n = 59	no hospitalized >7 days @V0, n = 59	118	4.93 [2.28 - 11.1]	p = 0.0026
CT abnormalities @V3	Any comorbidity, n = 90	no any comorbidity, n = 28	118	6.86 [2.41 - 24.8]	p = 0.01
CT abnormalities @V3	>3 comorbidities, n = 37	no >3 comorbidities, n = 81	118	6.05 [2.62 - 14.9]	p = 0.0026
CT abnormalities @V3	Overweight or obesity, n = 72	no overweight or obesity, n = 46	118	1.61 [0.762 - 3.48]	ns (p = 0.3)
CT abnormalities @V3	>6 symptoms @V0, n = 33	no >6 symptoms @V0, n = 85	118	0.767 [0.333 - 1.73]	ns (p = 0.59)
CT abnormalities @V3	Persistent symptoms @V1, n = 93	no persistent symptoms @V1, n = 25	118	1.91 [0.769 - 5.08]	ns (p = 0.26)
CT abnormalities @V3	Anti-S1/S2 IgG Q1 @V1, n = 31	no anti-S1/S2 IgG Q1 @V1, n = 79	110	0.0769 [0.0173 - 0.24]	p = 0.0026
CT abnormalities @V3	Anti-S1/S2 IgG Q2 @V1, n = 30	no anti-S1/S2 IgG Q2 @V1, n = 80	110	1.12 [0.481 - 2.62]	ns (p = 0.83)
CT abnormalities @V3	Anti-S1/S2 IgG Q3 @V1, n = 27	no anti-S1/S2 IgG Q3 @V1, n = 83	110	1.8 [0.753 - 4.4]	ns (p = 0.28)
CT abnormalities @V3	Anti-S1/S2 IgG Q4 @V1, n = 22	no anti-S1/S2 IgG Q4 @V1, n = 88	110	5.95 [2.13 - 19.5]	p = 0.01
CT abnormalities @V3	Ambulatory @V0, n = 33	no ambulatory @V0, n = 85	118	0.106 [0.0296 - 0.299]	p = 0.0026
CT abnormalities @V3	Hospitalized @V0, n = 33	no hospitalized @V0, n = 85	118	1.28 [0.569 - 2.88]	ns (p = 0.61)
CT abnormalities @V3	Oxygen therapy @V0, n = 33	no oxygen therapy @V0, n = 85	118	1.52 [0.676 - 3.43]	ns (p = 0.38)
CT abnormalities @V3	ICU @V0, n = 19	no iCU @V0, n = 99	118	6.28 [2.1 - 23.3]	p = 0.012
CT Severity Score @V3 > 5	Male sex, n = 63	no male sex, n = 55	118	5.1 [1.75 - 18.7]	p = 0.01
CT Severity Score @V3 > 5	Obesity, n = 22	no obesity, n = 96	118	0.38 [0.0577 - 1.46]	ns (p = 0.26)
CT Severity Score @V3 > 5	Current smoker, n = 4	no current smoker, n = 114	118	1.48 [0.0711 - 12.2]	ns (p = 0.77)
CT Severity Score @V3 > 5	Ex-smoker, n = 48	no ex-smoker, n = 70	118	1.59 [0.623 - 4.09]	ns (p = 0.37)
CT Severity Score @V3 > 5	CVD, n = 45	no cVD, n = 73	118	4.71 [1.8 - 13.5]	p = 0.0042
CT Severity Score @V3 > 5	Hypertension, n = 34	no hypertension, n = 84	118	3.17 [1.21 - 8.38]	p = 0.029
CT Severity Score @V3 > 5	PD, n = 24	no pD, n = 94	118	2.17 [0.735 - 6.02]	ns (p = 0.18)
CT Severity Score @V3 > 5	COPD, n = 6	no cOPD, n = 112	118	2.3 [0.304 - 12.7]	ns (p = 0.39)
CT Severity Score @V3 > 5	Asthma, n = 9	no asthma, n = 109	118	2.37 [0.468 - 9.85]	ns (p = 0.29)
CT Severity Score @V3 > 5	Metabolic disorders, n = 50	no metabolic disorders, n = 68	118	2.92 [1.14 - 7.95]	p = 0.045
CT Severity Score @V3 > 5	Hypercholesterolemia, n = 22	no hypercholesterolemia, n = 96	118	2.52 [0.845 - 7.12]	ns (p = 0.12)
CT Severity Score @V3 > 5	Diabetes, n = 18	no diabetes, n = 100	118	2.63 [0.816 - 7.87]	ns (p = 0.12)
CT Severity Score @V3 > 5	CKD, n = 6	no cKD, n = 112	118	4.89 [0.851 - 28.3]	ns (p = 0.091)
CT Severity Score @V3 > 5	GITD, n = 17	no gITD, n = 101	118	2.9 [0.892 - 8.83]	ns (p = 0.092)
CT Severity Score @V3 > 5	Malignancy, n = 13	no malignancy, n = 105	118	0.333 [0.0178 - 1.84]	ns (p = 0.35)
CT Severity Score @V3 > 5	Immune deficiency, n = 5	no immune deficiency, n = 113	118	7.42 [1.16 - 59.3]	ns (p = 0.052)
CT Severity Score @V3 > 5	Weight loss @V0, n = 84	no weight loss @V0, n = 34	118	3.02 [0.939 - 13.5]	ns (p = 0.13)
CT Severity Score @V3 > 5	Dyspnea @V0, n = 81	no dyspnea @V0, n = 37	118	1.7 [0.609 - 5.54]	ns (p = 0.38)
CT Severity Score @V3 > 5	Cough @V0, n = 83	no cough @V0, n = 35	118	0.537 [0.206 - 1.44]	ns (p = 0.25)
CT Severity Score @V3 > 5	Fever @V0, n = 83	no fever @V0, n = 35	118	2.15 [0.727 - 7.9]	ns (p = 0.24)
CT Severity Score @V3 > 5	Night sweat @V0, n = 74	no night sweat @V0, n = 44	118	2.33 [0.84 - 7.55]	ns (p = 0.17)
CT Severity Score @V3 > 5	Pain @V0, n = 65	no pain @V0, n = 53	118	0.495 [0.187 - 1.26]	ns (p = 0.18)
CT Severity Score @V3 > 5	GI symptoms @V0, n = 47	no gI symptoms @V0, n = 71	118	0.503 [0.168 - 1.34]	ns (p = 0.23)
CT Severity Score @V3 > 5	Anosmia @V0, n = 53	no anosmia @V0, n = 65	118	1.61 [0.634 - 4.16]	ns (p = 0.36)
CT Severity Score @V3 > 5	Impaired performance @V0, n = 106	no impaired performance @V0, n = 12	118	2.72 [0.486 - 51]	ns (p = 0.39)
CT Severity Score @V3 > 5	Sleep disorders @V0, n = 40	no sleep disorders @V0, n = 77	117	1.13 [0.412 - 2.91]	ns (p = 0.84)
CT Severity Score @V3 > 5	Anti-infectives @V0, n = 64	no anti-infectives @V0, n = 54	118	4.89 [1.68 - 17.9]	p = 0.012
CT Severity Score @V3 > 5	Anti-platelet @V0, n = 12	no anti-platelet @V0, n = 106	118	3.74 [1.01 - 13.2]	ns (p = 0.06)
CT Severity Score @V3 > 5	Anti-coagulatives @V0, n = 4	no anti-coagulatives @V0, n = 114	118	4.7 [0.538 - 41.1]	ns (p = 0.17)
CT Severity Score @V3 > 5	Immunosuppression @V0, n = 20	no immunosuppression @V0, n = 98	118	5.35 [1.85 - 15.6]	p = 0.0036
CT Severity Score @V3 > 5	Anemia @V1, n = 10	no anemia @V1, n = 108	118	8.62 [2.23 - 37.1]	p = 0.0039
CT Severity Score @V3 > 5	Elevated ferritin @V1, n = 20	no elevated ferritin @V1, n = 98	118	2.2 [0.693 - 6.42]	ns (p = 0.2)
CT Severity Score @V3 > 5	Elevated NTproBNP @V1, n = 38	no elevated NTproBNP @V1, n = 80	118	3.23 [1.25 - 8.55]	p = 0.026
CT Severity Score @V3 > 5	Elevated D-dimer @V1, n = 49	no elevated D-dimer @V1, n = 69	118	2.41 [0.945 - 6.38]	ns (p = 0.096)
CT Severity Score @V3 > 5	Elevated CRP @V1, n = 18	no elevated CRP @V1, n = 100	118	4.91 [1.63 - 14.7]	p = 0.0075
CT Severity Score @V3 > 5	Elevated IL-6 @V1, n = 11	no elevated IL-6 @V1, n = 107	118	32.5 [7.43 - 230]	p = 7.5e-05
CT Severity Score @V3 > 5	Iron deficiency @V1, n = 6	no iron deficiency @V1, n = 112	118	0.867 [0.044 - 5.75]	ns (p = 0.92)
CT Severity Score @V3 > 5	Age over 65, n = 32	no age over 65, n = 86	118	2.8 [1.05 - 7.4]	ns (p = 0.055)
CT Severity Score @V3 > 5	Hospitalized >7 days @V0, n = 59	no hospitalized >7 days @V0, n = 59	118	4.37 [1.58 - 14.2]	p = 0.012
CT Severity Score @V3 > 5	Any comorbidity, n = 90	no any comorbidity, n = 28	118	8.22 [1.59 - 151]	ns (p = 0.065)
CT Severity Score @V3 > 5	>3 comorbidities, n = 37	no >3 comorbidities, n = 81	118	5.55 [2.11 - 15.5]	p = 0.0013
CT Severity Score @V3 > 5	Overweight or obesity, n = 72	no overweight or obesity, n = 46	118	0.72 [0.282 - 1.87]	ns (p = 0.53)
CT Severity Score @V3 > 5	>6 symptoms @V0, n = 33	no >6 symptoms @V0, n = 85	118	1.26 [0.438 - 3.35]	ns (p = 0.69)
CT Severity Score @V3 > 5	Persistent symptoms @V1, n = 93	no persistent symptoms @V1, n = 25	118	3.15 [0.831 - 20.7]	ns (p = 0.18)
CT Severity Score @V3 > 5	Anti-S1/S2 IgG Q2 @V1, n = 30	no anti-S1/S2 IgG Q2 @V1, n = 80	110	1.87 [0.666 - 5.07]	ns (p = 0.26)
CT Severity Score @V3 > 5	Anti-S1/S2 IgG Q3 @V1, n = 27	no anti-S1/S2 IgG Q3 @V1, n = 83	110	0.675 [0.18 - 2.05]	ns (p = 0.55)
CT Severity Score @V3 > 5	Anti-S1/S2 IgG Q4 @V1, n = 22	no anti-S1/S2 IgG Q4 @V1, n = 88	110	4.38 [1.53 - 12.6]	p = 0.01
CT Severity Score @V3 > 5	Ambulatory @V0, n = 33	no ambulatory @V0, n = 85	118	0.0952 [0.0052 - 0.488]	p = 0.039
CT Severity Score @V3 > 5	Hospitalized @V0, n = 33	no hospitalized @V0, n = 85	118	0.714 [0.218 - 2.01]	ns (p = 0.58)
CT Severity Score @V3 > 5	Oxygen therapy @V0, n = 33	no oxygen therapy @V0, n = 85	118	0.958 [0.316 - 2.61]	ns (p = 0.95)
CT Severity Score @V3 > 5	ICU @V0, n = 19	no iCU @V0, n = 99	118	8.06 [2.75 - 24.5]	p = 0.00035
Symptoms present @V3	Male sex, n = 82	no male sex, n = 63	145	0.701 [0.361 - 1.35]	ns (p = 0.97)
Symptoms present @V3	Obesity, n = 28	no obesity, n = 117	145	0.42 [0.169 - 0.982]	ns (p = 0.84)
Symptoms present @V3	Current smoker, n = 4	no current smoker, n = 141	145	3.22 [0.401 - 66]	ns (p = 0.97)
Symptoms present @V3	Ex-smoker, n = 57	no ex-smoker, n = 88	145	1.27 [0.654 - 2.49]	ns (p = 0.97)
Symptoms present @V3	CVD, n = 58	no cVD, n = 87	145	0.851 [0.436 - 1.66]	ns (p = 0.97)
Symptoms present @V3	Hypertension, n = 44	no hypertension, n = 101	145	0.931 [0.456 - 1.89]	ns (p = 0.97)
Symptoms present @V3	PD, n = 27	no pD, n = 118	145	1.38 [0.598 - 3.26]	ns (p = 0.97)
Symptoms present @V3	COPD, n = 8	no cOPD, n = 137	145	1.04 [0.238 - 4.58]	ns (p = 0.97)
Symptoms present @V3	Asthma, n = 10	no asthma, n = 135	145	1.05 [0.279 - 3.92]	ns (p = 0.97)
Symptoms present @V3	Metabolic disorders, n = 63	no metabolic disorders, n = 82	145	1.02 [0.527 - 1.96]	ns (p = 0.97)
Symptoms present @V3	Hypercholesterolemia, n = 27	no hypercholesterolemia, n = 118	145	0.55 [0.226 - 1.28]	ns (p = 0.97)
Symptoms present @V3	Diabetes, n = 24	no diabetes, n = 121	145	1.05 [0.434 - 2.54]	ns (p = 0.97)
Symptoms present @V3	CKD, n = 10	no cKD, n = 135	145	1.62 [0.442 - 6.56]	ns (p = 0.97)
Symptoms present @V3	GITD, n = 20	no gITD, n = 125	145	1.68 [0.649 - 4.55]	ns (p = 0.97)
Symptoms present @V3	Malignancy, n = 17	no malignancy, n = 128	145	0.7 [0.241 - 1.94]	ns (p = 0.97)
Symptoms present @V3	Immune deficiency, n = 9	no immune deficiency, n = 136	145	0.824 [0.197 - 3.24]	ns (p = 0.97)
Symptoms present @V3	Weight loss @V0, n = 106	no weight loss @V0, n = 39	145	1.34 [0.644 - 2.84]	ns (p = 0.97)
Symptoms present @V3	Dyspnea @V0, n = 98	no dyspnea @V0, n = 47	145	2.84 [1.39 - 6.04]	ns (p = 0.2)
Symptoms present @V3	Cough @V0, n = 102	no cough @V0, n = 43	145	1.97 [0.96 - 4.17]	ns (p = 0.88)
Symptoms present @V3	Fever @V0, n = 106	no fever @V0, n = 39	145	1.17 [0.559 - 2.45]	ns (p = 0.97)
Symptoms present @V3	Night sweat @V0, n = 92	no night sweat @V0, n = 53	145	1.42 [0.723 - 2.83]	ns (p = 0.97)
Symptoms present @V3	Pain @V0, n = 78	no pain @V0, n = 67	145	1.92 [0.993 - 3.75]	ns (p = 0.84)
Symptoms present @V3	GI symptoms @V0, n = 59	no gI symptoms @V0, n = 86	145	1.27 [0.656 - 2.48]	ns (p = 0.97)
Symptoms present @V3	Anosmia @V0, n = 62	no anosmia @V0, n = 83	145	1.69 [0.874 - 3.31]	ns (p = 0.96)
Symptoms present @V3	Impaired performance @V0, n = 132	no impaired performance @V0, n = 13	145	1.13 [0.358 - 3.69]	ns (p = 0.97)
Symptoms present @V3	Sleep disorders @V0, n = 56	no sleep disorders @V0, n = 88	144	1.38 [0.708 - 2.73]	ns (p = 0.97)
Symptoms present @V3	Anti-infectives @V0, n = 78	no anti-infectives @V0, n = 67	145	0.701 [0.362 - 1.35]	ns (p = 0.97)
Symptoms present @V3	Anti-platelet @V0, n = 22	no anti-platelet @V0, n = 123	145	1.05 [0.42 - 2.63]	ns (p = 0.97)
Symptoms present @V3	Anti-coagulatives @V0, n = 9	no anti-coagulatives @V0, n = 136	145	2.18 [0.553 - 10.7]	ns (p = 0.97)
Symptoms present @V3	Immunosuppression @V0, n = 27	no immunosuppression @V0, n = 118	145	1.38 [0.598 - 3.26]	ns (p = 0.97)
Symptoms present @V3	Anemia @V1, n = 16	no anemia @V1, n = 129	145	0.591 [0.191 - 1.69]	ns (p = 0.97)
Symptoms present @V3	Elevated ferritin @V1, n = 26	no elevated ferritin @V1, n = 118	144	1.29 [0.551 - 3.07]	ns (p = 0.97)
Symptoms present @V3	Elevated NTproBNP @V1, n = 52	no elevated NTproBNP @V1, n = 93	145	1.96 [0.987 - 3.94]	ns (p = 0.84)
Symptoms present @V3	Elevated D-dimer @V1, n = 60	no elevated D-dimer @V1, n = 85	145	1.7 [0.874 - 3.33]	ns (p = 0.96)
Symptoms present @V3	Elevated CRP @V1, n = 23	no elevated CRP @V1, n = 122	145	1.16 [0.475 - 2.88]	ns (p = 0.97)
Symptoms present @V3	Elevated IL-6 @V1, n = 17	no elevated IL-6 @V1, n = 128	145	0.529 [0.173 - 1.48]	ns (p = 0.97)
Symptoms present @V3	Iron deficiency @V1, n = 6	no iron deficiency @V1, n = 138	144	2.18 [0.412 - 16.1]	ns (p = 0.97)
Symptoms present @V3	Age over 65, n = 43	no age over 65, n = 102	145	1.69 [0.827 - 3.51]	ns (p = 0.97)
Symptoms present @V3	Hospitalized >7 days @V0, n = 80	no hospitalized >7 days @V0, n = 65	145	1.1 [0.569 - 2.12]	ns (p = 0.97)
Symptoms present @V3	Any comorbidity, n = 112	no any comorbidity, n = 33	145	1.03 [0.47 - 2.24]	ns (p = 0.97)
Symptoms present @V3	>3 comorbidities, n = 47	no >3 comorbidities, n = 98	145	1.46 [0.727 - 2.95]	ns (p = 0.97)
Symptoms present @V3	Overweight or obesity, n = 86	no overweight or obesity, n = 59	145	0.7 [0.358 - 1.36]	ns (p = 0.97)
Symptoms present @V3	>6 symptoms @V0, n = 42	no >6 symptoms @V0, n = 103	145	1.82 [0.885 - 3.82]	ns (p = 0.96)
Symptoms present @V3	Persistent symptoms @V1, n = 115	no persistent symptoms @V1, n = 30	145	4.12 [1.71 - 11.1]	ns (p = 0.2)
Symptoms present @V3	Anti-S1/S2 IgG Q1 @V1, n = 34	no anti-S1/S2 IgG Q1 @V1, n = 100	134	1.04 [0.476 - 2.28]	ns (p = 0.97)
Symptoms present @V3	Anti-S1/S2 IgG Q2 @V1, n = 33	no anti-S1/S2 IgG Q2 @V1, n = 101	134	1.13 [0.512 - 2.49]	ns (p = 0.97)
Symptoms present @V3	Anti-S1/S2 IgG Q3 @V1, n = 34	no anti-S1/S2 IgG Q3 @V1, n = 100	134	0.646 [0.289 - 1.41]	ns (p = 0.97)
Symptoms present @V3	Anti-S1/S2 IgG Q4 @V1, n = 33	no anti-S1/S2 IgG Q4 @V1, n = 101	134	1.32 [0.603 - 2.95]	ns (p = 0.97)
Symptoms present @V3	Ambulatory @V0, n = 36	no ambulatory @V0, n = 109	145	0.911 [0.426 - 1.94]	ns (p = 0.97)
Symptoms present @V3	Hospitalized @V0, n = 37	no hospitalized @V0, n = 108	145	0.983 [0.463 - 2.08]	ns (p = 0.97)
Symptoms present @V3	Oxygen therapy @V0, n = 40	no oxygen therapy @V0, n = 105	145	0.922 [0.442 - 1.91]	ns (p = 0.97)
Symptoms present @V3	ICU @V0, n = 32	no iCU @V0, n = 113	145	1.24 [0.564 - 2.74]	ns (p = 0.97)
Lung function impairment @V3	Male sex, n = 71	no male sex, n = 51	122	2.12 [0.964 - 4.85]	ns (p = 0.1)
Lung function impairment @V3	Obesity, n = 22	no obesity, n = 100	122	1.94 [0.746 - 5]	ns (p = 0.22)
Lung function impairment @V3	Current smoker, n = 3	no current smoker, n = 119	122	4.26 [0.397 - 93.4]	ns (p = 0.3)
Lung function impairment @V3	Ex-smoker, n = 45	no ex-smoker, n = 77	122	1.95 [0.897 - 4.26]	ns (p = 0.13)
Lung function impairment @V3	CVD, n = 49	no cVD, n = 73	122	1.57 [0.727 - 3.39]	ns (p = 0.31)
Lung function impairment @V3	Hypertension, n = 35	no hypertension, n = 87	122	1.56 [0.683 - 3.54]	ns (p = 0.34)
Lung function impairment @V3	PD, n = 23	no pD, n = 99	122	2.21 [0.869 - 5.62]	ns (p = 0.13)
Lung function impairment @V3	COPD, n = 7	no cOPD, n = 115	122	2.93 [0.615 - 15.5]	ns (p = 0.23)
Lung function impairment @V3	Asthma, n = 9	no asthma, n = 113	122	1.03 [0.208 - 4.12]	ns (p = 0.97)
Lung function impairment @V3	Metabolic disorders, n = 53	no metabolic disorders, n = 69	122	1.73 [0.807 - 3.73]	ns (p = 0.22)
Lung function impairment @V3	Hypercholesterolemia, n = 24	no hypercholesterolemia, n = 98	122	1.03 [0.383 - 2.61]	ns (p = 0.96)
Lung function impairment @V3	Diabetes, n = 21	no diabetes, n = 101	122	2.15 [0.816 - 5.64]	ns (p = 0.16)
Lung function impairment @V3	CKD, n = 8	no cKD, n = 114	122	17.2 [2.9 - 328]	p = 0.02
Lung function impairment @V3	GITD, n = 16	no gITD, n = 106	122	3.11 [1.07 - 9.42]	ns (p = 0.061)
Lung function impairment @V3	Malignancy, n = 14	no malignancy, n = 108	122	4.47 [1.43 - 15.6]	p = 0.025
Lung function impairment @V3	Immune deficiency, n = 6	no immune deficiency, n = 116	122	2.14 [0.38 - 12]	ns (p = 0.43)
Lung function impairment @V3	Weight loss @V0, n = 91	no weight loss @V0, n = 31	122	1.56 [0.645 - 4.08]	ns (p = 0.41)
Lung function impairment @V3	Dyspnea @V0, n = 82	no dyspnea @V0, n = 40	122	3.17 [1.31 - 8.58]	p = 0.029
Lung function impairment @V3	Cough @V0, n = 88	no cough @V0, n = 34	122	0.856 [0.375 - 2.01]	ns (p = 0.76)
Lung function impairment @V3	Fever @V0, n = 92	no fever @V0, n = 30	122	1.19 [0.496 - 3.01]	ns (p = 0.76)
Lung function impairment @V3	Night sweat @V0, n = 79	no night sweat @V0, n = 43	122	0.39 [0.176 - 0.852]	p = 0.033
Lung function impairment @V3	Pain @V0, n = 65	no pain @V0, n = 57	122	0.609 [0.282 - 1.3]	ns (p = 0.26)
Lung function impairment @V3	GI symptoms @V0, n = 46	no gI symptoms @V0, n = 76	122	0.715 [0.316 - 1.57]	ns (p = 0.47)
Lung function impairment @V3	Anosmia @V0, n = 51	no anosmia @V0, n = 71	122	0.895 [0.41 - 1.92]	ns (p = 0.82)
Lung function impairment @V3	Impaired performance @V0, n = 111	no impaired performance @V0, n = 11	122	0.84 [0.238 - 3.38]	ns (p = 0.82)
Lung function impairment @V3	Sleep disorders @V0, n = 46	no sleep disorders @V0, n = 75	121	0.7 [0.309 - 1.54]	ns (p = 0.44)
Lung function impairment @V3	Anti-infectives @V0, n = 63	no anti-infectives @V0, n = 59	122	2.65 [1.22 - 6]	p = 0.03
Lung function impairment @V3	Anti-platelet @V0, n = 17	no anti-platelet @V0, n = 105	122	4.8 [1.67 - 15.1]	p = 0.011
Lung function impairment @V3	Anti-coagulatives @V0, n = 7	no anti-coagulatives @V0, n = 115	122	2.93 [0.615 - 15.5]	ns (p = 0.23)
Lung function impairment @V3	Immunosuppression @V0, n = 22	no immunosuppression @V0, n = 100	122	2.45 [0.95 - 6.34]	ns (p = 0.096)
Lung function impairment @V3	Anemia @V1, n = 11	no anemia @V1, n = 111	122	4.14 [1.17 - 16.7]	ns (p = 0.053)
Lung function impairment @V3	Elevated ferritin @V1, n = 21	no elevated ferritin @V1, n = 100	121	1.37 [0.498 - 3.6]	ns (p = 0.58)
Lung function impairment @V3	Elevated NTproBNP @V1, n = 44	no elevated NTproBNP @V1, n = 78	122	2.42 [1.11 - 5.33]	p = 0.046
Lung function impairment @V3	Elevated D-dimer @V1, n = 50	no elevated D-dimer @V1, n = 72	122	3.23 [1.49 - 7.2]	p = 0.0089
Lung function impairment @V3	Elevated CRP @V1, n = 17	no elevated CRP @V1, n = 105	122	6.6 [2.24 - 22.3]	p = 0.0029
Lung function impairment @V3	Elevated IL-6 @V1, n = 9	no elevated IL-6 @V1, n = 113	122	20.2 [3.52 - 383]	p = 0.013
Lung function impairment @V3	Iron deficiency @V1, n = 6	no iron deficiency @V1, n = 115	121	1.05 [0.142 - 5.65]	ns (p = 0.96)
Lung function impairment @V3	Age over 65, n = 33	no age over 65, n = 89	122	2.55 [1.11 - 5.88]	p = 0.046
Lung function impairment @V3	Hospitalized >7 days @V0, n = 66	no hospitalized >7 days @V0, n = 56	122	3.83 [1.7 - 9.21]	p = 0.0045
Lung function impairment @V3	Any comorbidity, n = 93	no any comorbidity, n = 29	122	3.95 [1.39 - 14.2]	p = 0.032
Lung function impairment @V3	>3 comorbidities, n = 41	no >3 comorbidities, n = 81	122	2.47 [1.12 - 5.48]	p = 0.044
Lung function impairment @V3	Overweight or obesity, n = 72	no overweight or obesity, n = 50	122	1.24 [0.575 - 2.73]	ns (p = 0.64)
Lung function impairment @V3	>6 symptoms @V0, n = 34	no >6 symptoms @V0, n = 88	122	0.538 [0.207 - 1.29]	ns (p = 0.23)
Lung function impairment @V3	Persistent symptoms @V1, n = 96	no persistent symptoms @V1, n = 26	122	1.83 [0.702 - 5.39]	ns (p = 0.3)
Lung function impairment @V3	Anti-S1/S2 IgG Q1 @V1, n = 28	no anti-S1/S2 IgG Q1 @V1, n = 84	112	0.245 [0.0675 - 0.704]	p = 0.03
Lung function impairment @V3	Anti-S1/S2 IgG Q2 @V1, n = 27	no anti-S1/S2 IgG Q2 @V1, n = 85	112	2.23 [0.913 - 5.45]	ns (p = 0.12)
Lung function impairment @V3	Anti-S1/S2 IgG Q3 @V1, n = 28	no anti-S1/S2 IgG Q3 @V1, n = 84	112	0.72 [0.27 - 1.78]	ns (p = 0.55)
Lung function impairment @V3	Anti-S1/S2 IgG Q4 @V1, n = 29	no anti-S1/S2 IgG Q4 @V1, n = 83	112	1.88 [0.784 - 4.51]	ns (p = 0.21)
Lung function impairment @V3	Ambulatory @V0, n = 32	no ambulatory @V0, n = 90	122	0.214 [0.0597 - 0.603]	p = 0.017
Lung function impairment @V3	Hospitalized @V0, n = 32	no hospitalized @V0, n = 90	122	1.1 [0.458 - 2.56]	ns (p = 0.85)
Lung function impairment @V3	Oxygen therapy @V0, n = 32	no oxygen therapy @V0, n = 90	122	1.33 [0.561 - 3.07]	ns (p = 0.57)
Lung function impairment @V3	ICU @V0, n = 26	no iCU @V0, n = 96	122	2.56 [1.05 - 6.27]	ns (p = 0.061)

## Sheet: figure 6 source data 1
Cluster	Variable
Cluster #1	Male sex, CVD, Hypertension, Metabolic disorders, Anti-infectives @V0, Elevated NTproBNP @V1, Elevated D-dimer @V1, Hospitalized >7 days @V0, >3 comorbidities, Overweight or obesity
Cluster #2	Obesity, Current smoker, Ex-smoker, PD, COPD, Asthma, Hypercholesterolemia, Diabetes, CKD, GITD, Malignancy, Immune deficiency, GI symptoms @V0, Anosmia @V0, Sleep disorders @V0, Anti-platelet @V0, Anti-coagulatives @V0, Immunosuppression @V0, Anemia @V1, Elevated ferritin @V1, Elevated CRP @V1, Elevated IL-6 @V1, Iron deficiency @V1, Age over 65, >6 symptoms @V0, Anti-S1/S2 IgG Q1 @V1, Anti-S1/S…
Cluster #3	Weight loss @V0, Dyspnea @V0, Cough @V0, Fever @V0, Night sweat @V0, Pain @V0, Impaired performance @V0, Any comorbidity, Persistent symptoms @V1, Symptoms present @V3

## Sheet: figure 7 and 8 source data 1
SOM node	Risk cluster	CT abnormality	CT sev. score 1 - 5	CT sev. score over 5	Symptoms present	LF impaired	Severity	Dyspnea @V3	Cough @V3	Fever @V3	Night sweating @V3	Hyposmia @V3	Imp. performance @V3	Sleep disorder @V3	Pain @V3	GI symptoms @V3	CT abnormailty grading	ID
4	LR	no	no	no	yes	yes	Hospitalized	0	0	0	0	0	1	0	0	0	absent	P001
1	IR	yes	yes	no	yes	yes	Hospitalized oxygen therapy	0	1	0	0	0	0	0	0	0	1-5 pt	P002
6	IR	yes	yes	no	yes	no	Hospitalized oxygen therapy	1	0	0	0	1	1	0	0	0	1-5 pt	P003
8	LR	no	no	no	yes	no	Outpatient	1	0	0	1	0	1	0	1	0	absent	P004
2	IR	yes	yes	no	yes	yes	Hospitalized	1	0	0	1	0	1	0	0	0	1-5 pt	P005
8	LR	no	no	no	yes	no	Outpatient	0	0	0	0	0	0	0	1	0	absent	P006
8	LR	yes	yes	no	yes	yes	Hospitalized	1	0	0	1	0	0	1	0	0	1-5 pt	P007
15	HR	yes	yes	no	no	yes	Outpatient	0			0					0	1-5 pt	P008
4	LR	no	no	no	no	no	Outpatient	0	0	0	0	0	0	0	0	0	absent	P009
1	IR	no	no	no	no	no	Hospitalized oxygen therapy	0	0	0	0	0	0	0	0	0	absent	P010
12	LR	no	no	no	no		Hospitalized	0			0					0	absent	P011
4	LR	no	no	no	yes		Hospitalized	0	1	0	0	0	0	0	0	0	absent	P012
1	IR	yes	no	yes	yes	yes	Hospitalized oxygen therapy	1	0	0	0	0	1	1	0	1	>5 pt	P013
12	LR	no	no	no	yes	yes	Hospitalized	1	1	0	1	1	1	1	1	0	absent	P014
6	IR	no	no	no	no	no	Hospitalized oxygen therapy	0			0					0	absent	P015
13	HR				no		Hospitalized ICU	0			0					0		P016
8	LR	no	no	no	no	no	Hospitalized	0	0	0	0	0	0	0	0	0	absent	P017
16	HR	no	no	no	yes	no	Hospitalized oxygen therapy	0	0	0	0	0	1	1	0	1	absent	P020
9	HR	yes	yes	no	no	no	Hospitalized ICU	0	0	0	0	0	0	0	0	0	1-5 pt	P022
5	IR				no		Hospitalized oxygen therapy	0			0					0		P023
6	IR	no	no	no	no	no	Hospitalized oxygen therapy	0	0	0	0	0	0	0	0	0	absent	P024
1	IR	yes	no	yes	yes	no	Hospitalized oxygen therapy	1	0	0	0	0	0	0	0	0	>5 pt	P025
15	HR	yes	yes	no	no	no	Hospitalized oxygen therapy	0	0	0	0	0	0	0	0	0	1-5 pt	P026
2	IR	yes	no	yes	yes	no	Hospitalized	1	0	0	0	0	1	0	0	1	>5 pt	P027
8	LR	no	no	no	yes	no	Outpatient	1	0	0	1	1	0	1	0	1	absent	P028
12	LR	yes	yes	no	yes	no	Hospitalized	0	1	0	0	0	0	1	0	0	1-5 pt	P029
16	HR	yes	yes	no	no	no	Hospitalized	0	0	0	0	0	0	0	0	0	1-5 pt	P030
4	LR	no	no	no	no	yes	Hospitalized	0	0	0	0	0	0	0	0	0	absent	P031
5	IR	yes	yes	no	no	yes	Hospitalized oxygen therapy	0	0	0	0	0	0	0	0	0	1-5 pt	P032
4	LR	no	no	no	no	no	Outpatient	0	0	0	0	0	0	0	0	0	absent	P033
4	LR	no	no	no	no		Hospitalized oxygen therapy	0			0					0	absent	P034
2	IR	no	no	no	no	no	Hospitalized oxygen therapy	0	0	0	0	0	0	0	0	0	absent	P035
4	LR	no	no	no	yes	no	Outpatient	0	0	0	0	0	1	0	0	0	absent	P036
4	LR				yes	no	Hospitalized oxygen therapy	1	0	0	0	0	0	0	0	0		P037
15	HR	no	no	no	yes	no	Hospitalized oxygen therapy	0	0	0	0	0	1	1	0	0	absent	P038
6	IR	no	no	no	yes	no	Hospitalized oxygen therapy	1	0	0	1	1	0	1	0	0	absent	P039
16	HR	yes	yes	no	no	no	Hospitalized oxygen therapy	0	0	0	0	0	0	0	0	0	1-5 pt	P040
16	HR	no	no	no	no	no	Hospitalized oxygen therapy	0	0	0	0	0	0	0	0	0	absent	P041
4	LR	no	no	no	yes	no	Hospitalized	0	1	0	1	0	0	0	0	0	absent	P042
8	LR	no	no	no	no	no	Outpatient	0	0	0	0	0	0	0	0	0	absent	P043
10	HR				no	no	Hospitalized oxygen therapy	0	0	0	0	0	0	0	0	0		P044
12	LR	no	no	no	yes	yes	Hospitalized oxygen therapy	0	0	0	1	0	1	0	0	0	absent	P045
2	IR	yes	no	yes	yes	yes	Hospitalized	0	1	0	0	0	1	0	0	0	>5 pt	P046
12	LR	no	no	no	no	no	Hospitalized	0	0	0	0	0	0	0	0	0	absent	P047
1	IR	yes	no	yes	no	yes	Hospitalized oxygen therapy	0	0	0	0	0	0	0	0	0	>5 pt	P048
6	IR	yes	yes	no	yes	yes	Hospitalized oxygen therapy	1	0	0	0	0	1	0	0	0	1-5 pt	P049
8	LR	no	no	no	yes	no	Outpatient	1	0	0	0	0	0	0	0	0	absent	P050
6	IR	yes	yes	no	no	no	Hospitalized oxygen therapy	0	0	0	0	0	0	0	0	0	1-5 pt	P051
4	LR	yes	no	yes	no	yes	Hospitalized	0	0	0	0	0	0	0	0	0	>5 pt	P052
16	HR	yes	yes	no	no	yes	Hospitalized oxygen therapy	0	0	0	0	0	0	0	0	0	1-5 pt	P053
16	HR	no	no	no	no		Hospitalized oxygen therapy	0			0					0	absent	P054
12	LR	yes	yes	no	yes	no	Hospitalized	0	0	0	1	0	0	1	0	0	1-5 pt	P055
1	IR				no	yes	Hospitalized oxygen therapy	0	0	0	0	0	0	0	0	0		P056
4	LR	no	no	no	no	yes	Outpatient	0	0	0	0	0	0	0	0	0	absent	P057
16	HR	no	no	no	no	no	Hospitalized ICU	0	0	0	0	0	0	0	0	0	absent	P058
3	LR	yes	yes	no	yes	no	Outpatient	0	1	0	1	0	1	0	0	1	1-5 pt	P059
12	LR	yes	yes	no	no	no	Hospitalized	0	0	0	0	0	0	0	0	0	1-5 pt	P060
8	LR	no	no	no	yes	no	Hospitalized	0	1	0	0	1	0	1	0	0	absent	P061
4	LR	no	no	no	yes	no	Outpatient	0	0	0	0	0	0	1	0	0	absent	P062
12	LR				no		Hospitalized ICU	0			0					0		P063
8	LR	no	no	no	yes	yes	Outpatient	1	0	0	0	1	1	0	1	0	absent	P064
10	HR	yes	no	yes	yes	no	Hospitalized oxygen therapy	0	0	0	0	0	1	1	0	0	>5 pt	P065
5	IR	yes	no	yes	yes	yes	Hospitalized oxygen therapy	0	1	0	0	1	0	0	0	0	>5 pt	P066
8	LR				no		Hospitalized	0			0					0		P067
8	LR	no	no	no	no	no	Outpatient	0	0	0	0	0	0	0	0	0	absent	P068
4	LR	no	no	no	no		Hospitalized oxygen therapy	0			0					0	absent	P069
6	IR	no	no	no	yes	no	Hospitalized oxygen therapy	0	0	0	0	1	0	0	0	0	absent	P070
12	LR	no	no	no	yes	no	Hospitalized oxygen therapy	0	0	0	0	0	0	1	0	0	absent	P071
15	HR	yes	yes	no	no	no	Hospitalized	0	0	0	0	0	0	0	0	0	1-5 pt	P072
15	HR				no		Hospitalized	0			0					0		P073
13	HR	yes	no	yes	yes	yes	Hospitalized ICU	1	0	0	1	0	0	0	0	0	>5 pt	P074
9	HR	yes	yes	no	no	yes	Hospitalized ICU	0	0	0	0	0	0	0	0	0	1-5 pt	P075
5	IR	yes	yes	no	yes	yes	Hospitalized oxygen therapy	0	0	0	0	0	1	1	0	0	1-5 pt	P076
12	LR	no	no	no	yes	no	Hospitalized ICU	1	0	0	1	0	1	1	1	1	absent	P077
8	LR				no		Outpatient	0			0					0		P078
8	LR	yes	yes	no	no	no	Hospitalized	0			0					0	1-5 pt	P079
15	HR	yes	yes	no	no	yes	Hospitalized ICU	0	0	0	0	0	0	0	0	0	1-5 pt	P080
9	HR	yes	no	yes	yes	yes	Hospitalized ICU	0	0	0	1	0	0	0	0	0	>5 pt	P081
10	HR	yes	yes	no	no	no	Hospitalized ICU	0	0	0	0	0	0	0	0	0	1-5 pt	P082
4	LR	no	no	no	no	no	Outpatient	0	0	0	0	0	0	0	0	0	absent	P083
10	HR	no	no	no	yes	no	Hospitalized ICU	0	0	0	0	0	0	1	0	0	absent	P084
8	LR				no		Outpatient	0			0					0		P085
16	HR	yes	no	yes	no	yes	Hospitalized	0	0	0	0	0	0	0	0	0	>5 pt	P086
16	HR	no	no	no	no	no	Hospitalized	0			0					0	absent	P087
12	LR	no	no	no	no	no	Hospitalized	0	0	0	0	0	0	0	0	0	absent	P088
13	HR	yes	no	yes	no	yes	Hospitalized ICU	0	0	0	0	0	0	0	0	0	>5 pt	P089
1	IR	yes	yes	no	yes	no	Hospitalized oxygen therapy	0	0	0	0	0	0	1	0	0	1-5 pt	P090
8	LR	no	no	no	no	no	Outpatient	0	0	0	0	0	0	0	0	0	absent	P091
8	LR	no	no	no	no	no	Outpatient	0	0	0	0	0	0	0	0	0	absent	P092
8	LR	no	no	no	no	no	Outpatient	0	0	0	0	0	0	0	0	0	absent	P093
10	HR	yes	no	yes	no	yes	Hospitalized ICU	0	0	0	0	0	0	0	0	0	>5 pt	P094
5	IR	yes	no	yes	yes	yes	Hospitalized	1	0	0	1	1	1	0	0	0	>5 pt	P095
12	LR	yes	yes	no	yes	no	Hospitalized	1	0	0	0	0	0	1	0	0	1-5 pt	P097
16	HR	yes	yes	no	no	no	Hospitalized	0	0	0	0	0	0	0	0	0	1-5 pt	P098
9	HR	no	no	no	yes	no	Hospitalized	1	1	0	0	0	0	0	0	0	absent	P099
4	LR	no	no	no	no	no	Hospitalized	0	0	0	0	0	0	0	0	0	absent	P100
6	IR				no		Hospitalized oxygen therapy	0			0					0		P101
12	LR	no	no	no	yes	no	Hospitalized	1	0	0	1	1	1	1	1	0	absent	P102
10	HR	yes	no	yes	yes	yes	Hospitalized ICU	0	0	0	1	0	0	0	0	0	>5 pt	P103
6	IR	yes	no	yes	yes	no	Hospitalized oxygen therapy	0	0	0	0	1	0	1	1	0	>5 pt	P104
8	LR	no	no	no	yes	no	Outpatient	1	1	0	1	0	1	1	1	1	absent	P105
8	LR	no	no	no	yes	no	Outpatient	0	1	0	1	1	0	1	0	0	absent	P106
16	HR	yes	no	yes	yes	no	Hospitalized ICU	0	0	0	0	0	1	1	0	0	>5 pt	P107
5	IR	no	no	no	yes	no	Hospitalized ICU	0	0	0	0	0	1	0	0	0	absent	P108
4	LR	yes	no	yes	yes	no	Outpatient	0	1	0	0	0	0	0	0	0	>5 pt	P109
16	HR				yes	yes	Hospitalized ICU	1	0	0	0	0	1	1	0	0		P110
16	HR	yes	yes	no	yes	no	Hospitalized ICU	1	0	0	1	0	1	1	0	0	1-5 pt	P111
8	LR	no	no	no	yes	no	Hospitalized	1	0	0	0	0	0	0	0	0	absent	P112
14	HR				no		Hospitalized ICU	0			0					0		P114
13	HR				no		Hospitalized ICU	0			0					0		P115
13	HR	yes	no	yes	yes	yes	Hospitalized ICU	1	1	0	0	0	1	0	1	0	>5 pt	P116
12	LR				yes	no	Hospitalized ICU	1	0	0	1	0	1	1	0	0		P117
16	HR				yes	yes	Hospitalized ICU	0	0	0	0	0	1	0	0	0		P118
12	LR				no	yes	Hospitalized	0	0	0	0	0	0	0	0	0		P119
4	LR	no	no	no	no	no	Outpatient	0	0	0	0	0	0	0	0	0	absent	P120
14	HR				yes	no	Hospitalized ICU	0	0	0	0	0	1	0	0	0		P121
1	IR	yes	yes	no	yes	yes	Hospitalized oxygen therapy	1	1	0	0	0	1	0	0	0	1-5 pt	P123
13	HR	yes	no	yes	no		Hospitalized ICU	0			0						>5 pt	P124
2	IR	no	no	no	no		Hospitalized	0			0						absent	P125
6	IR	no	no	no	no		Hospitalized oxygen therapy	0			0						absent	P126
9	HR				no	no	Hospitalized ICU	0			0							P127
12	LR				no		Hospitalized ICU	0			0							P128
9	HR				yes	no	Hospitalized ICU	0	0	0	0	0	1	0	0	0		P129
14	HR	yes	no	yes	yes	yes	Hospitalized ICU	0	0	0	0	0	1	1	0	0	>5 pt	P133
2	IR	no	no	no	no		Hospitalized oxygen therapy	0			0					0	absent	P134
9	HR				yes	yes	Hospitalized ICU	0	1	0	0	0	1	1	0	0		P135
8	LR	no	no	no	yes	yes	Outpatient	1	1	0	1	0	1	0	0	0	absent	P136
8	LR	no	no	no	no		Outpatient	0			0					0	absent	P137
8	LR	no	no	no	yes	no	Outpatient	0	0	0	0	0	1	0	0	0	absent	P138
5	IR				yes	yes	Hospitalized oxygen therapy	1	0	0	1	0	1	1	0	0		P139
8	LR	no	no	no	yes	no	Outpatient	1	0	0	0	0	1	0	0	0	absent	P140
8	LR	no	no	no	no		Outpatient	0			0					0	absent	P142
8	LR				no	no	Outpatient	0	0	0	0	0	0	0	0	0		P143

## Sheet: figure 9 source data 1
Outcome	Total N	Events N	Method	Data set	Accuracy	Kappa	AUC	Sensitivity	Specificity
CT Severity Score @V3 > 5	109	21	C5.0	cv	0.86 [0.67 - 1]	0.37 [-0.2 - 1]	0.7	0.39	0.98
CT Severity Score @V3 > 5	109	21	C5.0	training	0.87	0.5	0.7	0.43	0.98
CT Severity Score @V3 > 5	109	21	ensemble	cv	0.88 [0.81 - 0.96]	0.51 [0.044 - 0.89]	0.75	0.45	0.98
CT Severity Score @V3 > 5	109	21	ensemble	training	0.89	0.57	0.65	0.48	0.99
CT Severity Score @V3 > 5	109	21	glmnet	cv	0.84 [0.6 - 1]	0.34 [-0.25 - 1]	0.76	0.41	0.94
CT Severity Score @V3 > 5	109	21	glmnet	training	0.94	0.8	0.97	0.71	1
CT Severity Score @V3 > 5	109	21	nnet	cv	0.79 [0.5 - 1]	0.31 [-0.29 - 1]	0.72	0.47	0.87
CT Severity Score @V3 > 5	109	21	nnet	training	0.99	0.97	1	0.95	1
CT Severity Score @V3 > 5	109	21	rf	cv	0.84 [0.6 - 1]	0.34 [-0.25 - 1]	0.73	0.4	0.95
CT Severity Score @V3 > 5	109	21	rf	training	1	1	1	1	1
CT Severity Score @V3 > 5	109	21	svmRadial	cv	0.87 [0.63 - 1]	0.43 [-0.23 - 1]	0.75	0.48	0.97
CT Severity Score @V3 > 5	109	21	svmRadial	training	0.92	0.68	0.99	0.57	1
CT abnormalities @V3	109	49	C5.0	cv	0.72 [0.36 - 1]	0.43 [-0.35 - 1]	0.78	0.69	0.74
CT abnormalities @V3	109	49	C5.0	training	1	1	1	1	1
CT abnormalities @V3	109	49	ensemble	cv	0.78 [0.63 - 0.93]	0.55 [0.26 - 0.85]	0.81	0.75	0.8
CT abnormalities @V3	109	49	ensemble	training	0.93	0.85	0.98	0.86	0.98
CT abnormalities @V3	109	49	glmnet	cv	0.71 [0.3 - 1]	0.42 [-0.52 - 1]	0.79	0.71	0.72
CT abnormalities @V3	109	49	glmnet	training	1	1	1	1	1
CT abnormalities @V3	109	49	nnet	cv	0.67 [0.26 - 1]	0.35 [-0.38 - 1]	0.69	0.71	0.64
CT abnormalities @V3	109	49	nnet	training	0.76	0.54	0.78	1	0.57
CT abnormalities @V3	109	49	rf	cv	0.73 [0.4 - 1]	0.45 [-0.33 - 1]	0.78	0.72	0.74
CT abnormalities @V3	109	49	rf	training	1	1	1	1	1
CT abnormalities @V3	109	49	svmRadial	cv	0.75 [0.4 - 1]	0.51 [-0.25 - 1]	0.8	0.78	0.73
CT abnormalities @V3	109	49	svmRadial	training	0.85	0.7	0.93	0.84	0.87
Lung function impairment @V3	111	38	C5.0	cv	0.73 [0.33 - 1]	0.39 [-0.5 - 1]	0.7	0.54	0.84
Lung function impairment @V3	111	38	C5.0	training	0.86	0.7	0.85	0.79	0.9
Lung function impairment @V3	111	38	ensemble	cv	0.75 [0.61 - 0.86]	0.39 [0.052 - 0.67]	0.72	0.48	0.89
Lung function impairment @V3	111	38	ensemble	training	0.89	0.75	0.98	0.79	0.95
Lung function impairment @V3	111	38	glmnet	cv	0.74 [0.4 - 1]	0.37 [-0.36 - 1]	0.66	0.51	0.86
Lung function impairment @V3	111	38	glmnet	training	0.83	0.59	0.89	0.61	0.95
Lung function impairment @V3	111	38	nnet	cv	0.65 [0.2 - 1]	0.2 [-0.5 - 1]	0.59	0.44	0.76
Lung function impairment @V3	111	38	nnet	training	0.93	0.83	0.82	0.79	1
Lung function impairment @V3	111	38	rf	cv	0.73 [0.4 - 1]	0.35 [-0.33 - 1]	0.72	0.49	0.85
Lung function impairment @V3	111	38	rf	training	1	1	1	1	1
Lung function impairment @V3	111	38	svmRadial	cv	0.72 [0.36 - 1]	0.35 [-0.44 - 1]	0.69	0.5	0.84
Lung function impairment @V3	111	38	svmRadial	training	0.87	0.71	0.94	0.71	0.96
Symptoms present @V3	133	65	C5.0	cv	0.6 [0.22 - 0.93]	0.2 [-0.51 - 0.87]	0.57	0.61	0.58
Symptoms present @V3	133	65	C5.0	training	0.93	0.86	0.96	0.89	0.97
Symptoms present @V3	133	65	ensemble	cv	0.58 [0.41 - 0.74]	0.16 [-0.19 - 0.49]	0.6	0.52	0.63
Symptoms present @V3	133	65	ensemble	training	0.99	0.98	1	0.98	1
Symptoms present @V3	133	65	glmnet	cv	0.56 [0.17 - 0.86]	0.13 [-0.64 - 0.72]	0.56	0.54	0.58
Symptoms present @V3	133	65	glmnet	training	0.85	0.7	0.92	0.82	0.88
Symptoms present @V3	133	65	nnet	cv	0.59 [0.29 - 0.86]	0.17 [-0.52 - 0.72]	0.58	0.6	0.57
Symptoms present @V3	133	65	nnet	training	1	1	1	1	1
Symptoms present @V3	133	65	rf	cv	0.56 [0.29 - 0.86]	0.13 [-0.46 - 0.71]	0.59	0.56	0.56
Symptoms present @V3	133	65	rf	training	1	1	1	1	1
Symptoms present @V3	133	65	svmRadial	cv	0.54 [0.17 - 0.83]	0.089 [-0.67 - 0.67]	0.55	0.45	0.62
Symptoms present @V3	133	65	svmRadial	training	0.86	0.73	0.94	0.85	0.88

## Sheet: figure 10 source data 1
Outcome	Cohort subset	Total N	Events N	Method	Data set	AUC	Sensitivity	Specificity
CT abnormalities @V3	whole cohort	109	49	C5.0	training	1	1	1
CT abnormalities @V3	mild - moderate COVID-19	58	18	C5.0	training	1	1	1
CT abnormalities @V3	severe - critical COVID-19	51	31	C5.0	training	1	1	1
CT abnormalities @V3	whole cohort	109	49	rf	training	1	1	1
CT abnormalities @V3	mild - moderate COVID-19	58	18	rf	training	1	1	1
CT abnormalities @V3	severe - critical COVID-19	51	31	rf	training	1	1	1
CT abnormalities @V3	whole cohort	109	49	svmRadial	training	0.93	0.84	0.87
CT abnormalities @V3	mild - moderate COVID-19	58	18	svmRadial	training	0.9	0.61	0.95
CT abnormalities @V3	severe - critical COVID-19	51	31	svmRadial	training	0.96	0.97	0.7
CT abnormalities @V3	whole cohort	109	49	nnet	training	0.78	1	0.57
CT abnormalities @V3	mild - moderate COVID-19	58	18	nnet	training	0.92	1	0.85
CT abnormalities @V3	severe - critical COVID-19	51	31	nnet	training	0.5	1	0
CT abnormalities @V3	whole cohort	109	49	glmnet	training	1	1	1
CT abnormalities @V3	mild - moderate COVID-19	58	18	glmnet	training	1	1	1
CT abnormalities @V3	severe - critical COVID-19	51	31	glmnet	training	1	1	1
CT abnormalities @V3	whole cohort	109	49	ensemble	training	0.98	0.86	0.98
CT abnormalities @V3	mild - moderate COVID-19	58	18	ensemble	training	0.98	0.61	1
CT abnormalities @V3	severe - critical COVID-19	51	31	ensemble	training	1	1	0.95
CT Severity Score @V3 > 5	whole cohort	109	21	C5.0	training	0.7	0.43	0.98
CT Severity Score @V3 > 5	mild - moderate COVID-19	58	6	C5.0	training	0.57	0.17	0.98
CT Severity Score @V3 > 5	severe - critical COVID-19	51	15	C5.0	training	0.75	0.53	0.97
CT Severity Score @V3 > 5	whole cohort	109	21	rf	training	1	1	1
CT Severity Score @V3 > 5	mild - moderate COVID-19	58	6	rf	training	1	1	1
CT Severity Score @V3 > 5	severe - critical COVID-19	51	15	rf	training	1	1	1
CT Severity Score @V3 > 5	whole cohort	109	21	svmRadial	training	0.99	0.57	1
CT Severity Score @V3 > 5	mild - moderate COVID-19	58	6	svmRadial	training	0.98	0.17	1
CT Severity Score @V3 > 5	severe - critical COVID-19	51	15	svmRadial	training	1	0.73	1
CT Severity Score @V3 > 5	whole cohort	109	21	nnet	training	1	0.95	1
CT Severity Score @V3 > 5	mild - moderate COVID-19	58	6	nnet	training	1	0.83	1
CT Severity Score @V3 > 5	severe - critical COVID-19	51	15	nnet	training	1	1	1
CT Severity Score @V3 > 5	whole cohort	109	21	glmnet	training	0.97	0.71	1
CT Severity Score @V3 > 5	mild - moderate COVID-19	58	6	glmnet	training	0.94	0.33	1
CT Severity Score @V3 > 5	severe - critical COVID-19	51	15	glmnet	training	1	0.87	1
CT Severity Score @V3 > 5	whole cohort	109	21	ensemble	training	0.65	0.48	0.99
CT Severity Score @V3 > 5	mild - moderate COVID-19	58	6	ensemble	training	0.38	0.17	0.98
CT Severity Score @V3 > 5	severe - critical COVID-19	51	15	ensemble	training	0.74	0.6	1
Symptoms present @V3	whole cohort	133	65	C5.0	training	0.96	0.89	0.97
Symptoms present @V3	mild - moderate COVID-19	64	30	C5.0	training	0.97	0.9	1
Symptoms present @V3	severe - critical COVID-19	69	35	C5.0	training	0.96	0.89	0.94
Symptoms present @V3	whole cohort	133	65	rf	training	1	1	1
Symptoms present @V3	mild - moderate COVID-19	64	30	rf	training	1	1	1
Symptoms present @V3	severe - critical COVID-19	69	35	rf	training	1	1	1
Symptoms present @V3	whole cohort	133	65	svmRadial	training	0.94	0.85	0.88
Symptoms present @V3	mild - moderate COVID-19	64	30	svmRadial	training	0.93	0.77	0.85
Symptoms present @V3	severe - critical COVID-19	69	35	svmRadial	training	0.95	0.91	0.91
Symptoms present @V3	whole cohort	133	65	nnet	training	1	1	1
Symptoms present @V3	mild - moderate COVID-19	64	30	nnet	training	1	1	1
Symptoms present @V3	severe - critical COVID-19	69	35	nnet	training	1	1	1
Symptoms present @V3	whole cohort	133	65	glmnet	training	0.92	0.82	0.88
Symptoms present @V3	mild - moderate COVID-19	64	30	glmnet	training	0.91	0.73	0.88
Symptoms present @V3	severe - critical COVID-19	69	35	glmnet	training	0.92	0.89	0.88
Symptoms present @V3	whole cohort	133	65	ensemble	training	1	0.98	1
Symptoms present @V3	mild - moderate COVID-19	64	30	ensemble	training	1	0.97	1
Symptoms present @V3	severe - critical COVID-19	69	35	ensemble	training	1	1	1
Lung function impairment @V3	whole cohort	111	38	C5.0	training	0.85	0.79	0.9
Lung function impairment @V3	mild - moderate COVID-19	55	14	C5.0	training	0.81	0.71	0.9
Lung function impairment @V3	severe - critical COVID-19	56	24	C5.0	training	0.87	0.83	0.91
Lung function impairment @V3	whole cohort	111	38	rf	training	1	1	1
Lung function impairment @V3	mild - moderate COVID-19	55	14	rf	training	1	1	1
Lung function impairment @V3	severe - critical COVID-19	56	24	rf	training	1	1	1
Lung function impairment @V3	whole cohort	111	38	svmRadial	training	0.94	0.71	0.96
Lung function impairment @V3	mild - moderate COVID-19	55	14	svmRadial	training	0.88	0.5	0.98
Lung function impairment @V3	severe - critical COVID-19	56	24	svmRadial	training	0.98	0.83	0.94
Lung function impairment @V3	whole cohort	111	38	nnet	training	0.82	0.79	1
Lung function impairment @V3	mild - moderate COVID-19	55	14	nnet	training	0.7	0.64	1
Lung function impairment @V3	severe - critical COVID-19	56	24	nnet	training	0.89	0.88	1
Lung function impairment @V3	whole cohort	111	38	glmnet	training	0.89	0.61	0.95
Lung function impairment @V3	mild - moderate COVID-19	55	14	glmnet	training	0.84	0.29	0.95
Lung function impairment @V3	severe - critical COVID-19	56	24	glmnet	training	0.91	0.79	0.94
Lung function impairment @V3	whole cohort	111	38	ensemble	training	0.98	0.79	0.95
Lung function impairment @V3	mild - moderate COVID-19	55	14	ensemble	training	0.97	0.71	0.95
Lung function impairment @V3	severe - critical COVID-19	56	24	ensemble	training	0.98	0.83	0.94
CT abnormalities @V3	whole cohort	109	49	C5.0	cv	0.78	0.69	0.74
CT abnormalities @V3	mild - moderate COVID-19	58	18	C5.0	cv	0.69	0.43	0.8
CT abnormalities @V3	severe - critical COVID-19	51	31	C5.0	cv	0.78	0.85	0.62
CT abnormalities @V3	whole cohort	109	49	rf	cv	0.78	0.72	0.74
CT abnormalities @V3	mild - moderate COVID-19	58	18	rf	cv	0.76	0.43	0.88
CT abnormalities @V3	severe - critical COVID-19	51	31	rf	cv	0.71	0.88	0.47
CT abnormalities @V3	whole cohort	109	49	svmRadial	cv	0.8	0.78	0.73
CT abnormalities @V3	mild - moderate COVID-19	58	18	svmRadial	cv	0.75	0.56	0.9
CT abnormalities @V3	severe - critical COVID-19	51	31	svmRadial	cv	0.76	0.92	0.4
CT abnormalities @V3	whole cohort	109	49	nnet	cv	0.69	0.71	0.64
CT abnormalities @V3	mild - moderate COVID-19	58	18	nnet	cv	0.67	0.59	0.77
CT abnormalities @V3	severe - critical COVID-19	51	31	nnet	cv	0.62	0.78	0.39
CT abnormalities @V3	whole cohort	109	49	glmnet	cv	0.79	0.71	0.72
CT abnormalities @V3	mild - moderate COVID-19	58	18	glmnet	cv	0.78	0.66	0.78
CT abnormalities @V3	severe - critical COVID-19	51	31	glmnet	cv	0.75	0.75	0.6
CT abnormalities @V3	whole cohort	109	49	ensemble	cv	0.81	0.75	0.8
CT abnormalities @V3	mild - moderate COVID-19	58	18	ensemble	cv	0.76	0.55	0.92
CT abnormalities @V3	severe - critical COVID-19	51	31	ensemble	cv	0.79	0.87	0.55
CT Severity Score @V3 > 5	whole cohort	109	21	C5.0	cv	0.7	0.39	0.98
CT Severity Score @V3 > 5	mild - moderate COVID-19	58	6	C5.0	cv	0.55	0.13	0.98
CT Severity Score @V3 > 5	severe - critical COVID-19	51	15	C5.0	cv	0.76	0.49	0.97
CT Severity Score @V3 > 5	whole cohort	109	21	rf	cv	0.73	0.4	0.95
CT Severity Score @V3 > 5	mild - moderate COVID-19	58	6	rf	cv	0.58	0.033	0.96
CT Severity Score @V3 > 5	severe - critical COVID-19	51	15	rf	cv	0.76	0.55	0.93
CT Severity Score @V3 > 5	whole cohort	109	21	svmRadial	cv	0.75	0.48	0.97
CT Severity Score @V3 > 5	mild - moderate COVID-19	58	6	svmRadial	cv	0.59	0.13	0.97
CT Severity Score @V3 > 5	severe - critical COVID-19	51	15	svmRadial	cv	0.79	0.61	0.97
CT Severity Score @V3 > 5	whole cohort	109	21	nnet	cv	0.72	0.47	0.87
CT Severity Score @V3 > 5	mild - moderate COVID-19	58	6	nnet	cv	0.57	0.17	0.89
CT Severity Score @V3 > 5	severe - critical COVID-19	51	15	nnet	cv	0.76	0.59	0.84
CT Severity Score @V3 > 5	whole cohort	109	21	glmnet	cv	0.76	0.41	0.94
CT Severity Score @V3 > 5	mild - moderate COVID-19	58	6	glmnet	cv	0.63	0.17	0.97
CT Severity Score @V3 > 5	severe - critical COVID-19	51	15	glmnet	cv	0.78	0.51	0.89
CT Severity Score @V3 > 5	whole cohort	109	21	ensemble	cv	0.75	0.45	0.98
CT Severity Score @V3 > 5	mild - moderate COVID-19	58	6	ensemble	cv	0.64	0.17	0.98
CT Severity Score @V3 > 5	severe - critical COVID-19	51	15	ensemble	cv	0.78	0.57	0.99
Symptoms present @V3	whole cohort	133	65	C5.0	cv	0.57	0.61	0.58
Symptoms present @V3	mild - moderate COVID-19	64	30	C5.0	cv	0.58	0.62	0.56
Symptoms present @V3	severe - critical COVID-19	69	35	C5.0	cv	0.55	0.6	0.6
Symptoms present @V3	whole cohort	133	65	rf	cv	0.59	0.56	0.56
Symptoms present @V3	mild - moderate COVID-19	64	30	rf	cv	0.6	0.61	0.55
Symptoms present @V3	severe - critical COVID-19	69	35	rf	cv	0.57	0.52	0.58
Symptoms present @V3	whole cohort	133	65	svmRadial	cv	0.55	0.45	0.62
Symptoms present @V3	mild - moderate COVID-19	64	30	svmRadial	cv	0.54	0.48	0.59
Symptoms present @V3	severe - critical COVID-19	69	35	svmRadial	cv	0.56	0.43	0.66
Symptoms present @V3	whole cohort	133	65	nnet	cv	0.58	0.6	0.57
Symptoms present @V3	mild - moderate COVID-19	64	30	nnet	cv	0.58	0.63	0.54
Symptoms present @V3	severe - critical COVID-19	69	35	nnet	cv	0.58	0.58	0.6
Symptoms present @V3	whole cohort	133	65	glmnet	cv	0.56	0.54	0.58
Symptoms present @V3	mild - moderate COVID-19	64	30	glmnet	cv	0.56	0.57	0.6
Symptoms present @V3	severe - critical COVID-19	69	35	glmnet	cv	0.55	0.51	0.56
Symptoms present @V3	whole cohort	133	65	ensemble	cv	0.6	0.52	0.63
Symptoms present @V3	mild - moderate COVID-19	64	30	ensemble	cv	0.61	0.57	0.63
Symptoms present @V3	severe - critical COVID-19	69	35	ensemble	cv	0.6	0.49	0.63
Lung function impairment @V3	whole cohort	111	38	C5.0	cv	0.7	0.54	0.84
Lung function impairment @V3	mild - moderate COVID-19	55	14	C5.0	cv	0.61	0.37	0.86
Lung function impairment @V3	severe - critical COVID-19	56	24	C5.0	cv	0.75	0.63	0.81
Lung function impairment @V3	whole cohort	111	38	rf	cv	0.72	0.49	0.85
Lung function impairment @V3	mild - moderate COVID-19	55	14	rf	cv	0.58	0.26	0.9
Lung function impairment @V3	severe - critical COVID-19	56	24	rf	cv	0.79	0.62	0.79
Lung function impairment @V3	whole cohort	111	38	svmRadial	cv	0.69	0.5	0.84
Lung function impairment @V3	mild - moderate COVID-19	55	14	svmRadial	cv	0.56	0.29	0.88
Lung function impairment @V3	severe - critical COVID-19	56	24	svmRadial	cv	0.75	0.62	0.79
Lung function impairment @V3	whole cohort	111	38	nnet	cv	0.59	0.44	0.76
Lung function impairment @V3	mild - moderate COVID-19	55	14	nnet	cv	0.47	0.29	0.83
Lung function impairment @V3	severe - critical COVID-19	56	24	nnet	cv	0.62	0.52	0.67
Lung function impairment @V3	whole cohort	111	38	glmnet	cv	0.66	0.51	0.86
Lung function impairment @V3	mild - moderate COVID-19	55	14	glmnet	cv	0.55	0.21	0.88
Lung function impairment @V3	severe - critical COVID-19	56	24	glmnet	cv	0.73	0.68	0.83
Lung function impairment @V3	whole cohort	111	38	ensemble	cv	0.72	0.48	0.89
Lung function impairment @V3	mild - moderate COVID-19	55	14	ensemble	cv	0.59	0.26	0.92
Lung function impairment @V3	severe - critical COVID-19	56	24	ensemble	cv	0.78	0.61	0.85
