# Supplementary material for: Investigating phenotypes of pulmonary COVID-19 recovery: A longitudinal observational prospective multicenter trial
Source: eLife journal article supplement (doi:10.7554/elife.72500), 2022-01-24

**A**

**Clustering variance**  
Between/total sum of squares

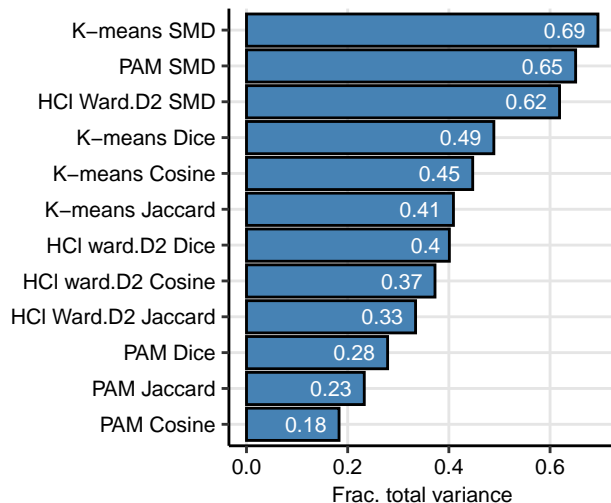**B**

**Cluster stability**  
20-fold cross-validation

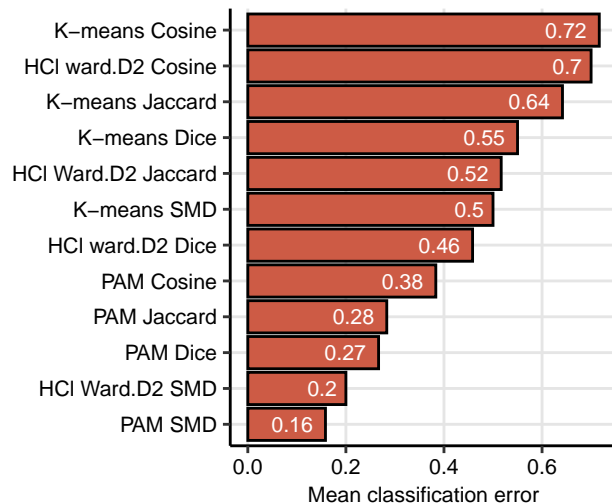**C**

**Optimal cluster number**  
PAM clustering, SMD distance

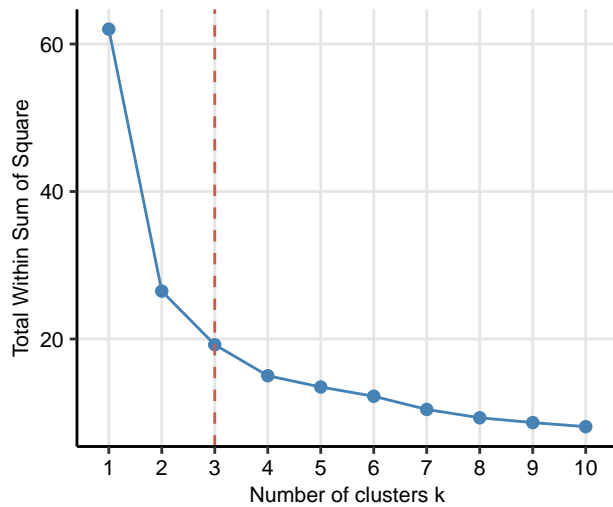**D**

**Cluster stability vs cluster number**  
20-fold cross-validation

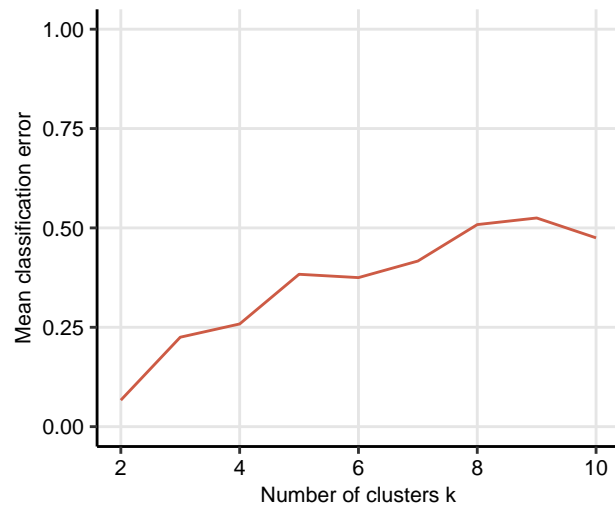

Supplement: supp [file elife_poa_e72500_Figure_6_figure_supplement_1.pdf › elife_poa_e72500_Figure_6_figure_supplement_1.pdf]
