# Supplementary material for: Investigating phenotypes of pulmonary COVID-19 recovery: A longitudinal observational prospective multicenter trial
Source: eLife journal article supplement (doi:10.7554/elife.72500), 2022-01-24

**A****Clustering variance**

Between/total sum of squares

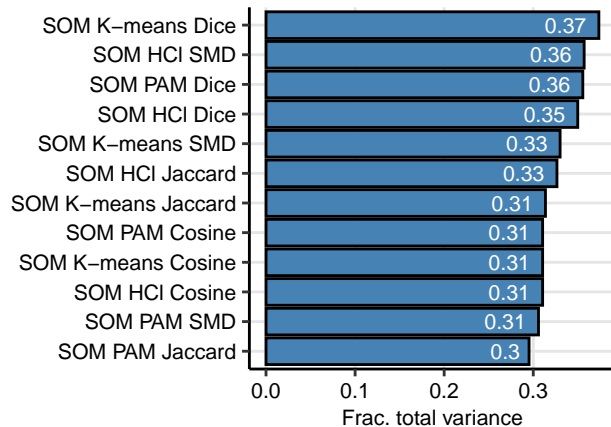**B****Cluster stability**

20-fold cross-validation

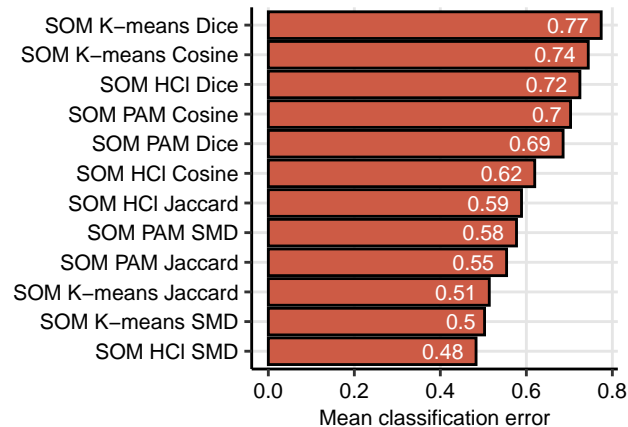**C****SOM clustering: training**

SMD

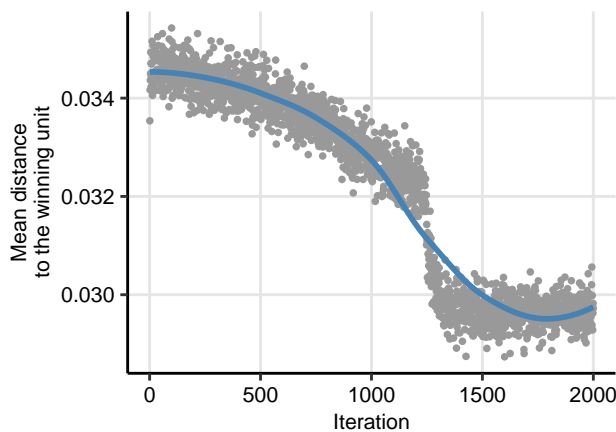**D****Optimal number of SOM node clusters**

HCI, Euclidean distance, Ward.D2 method

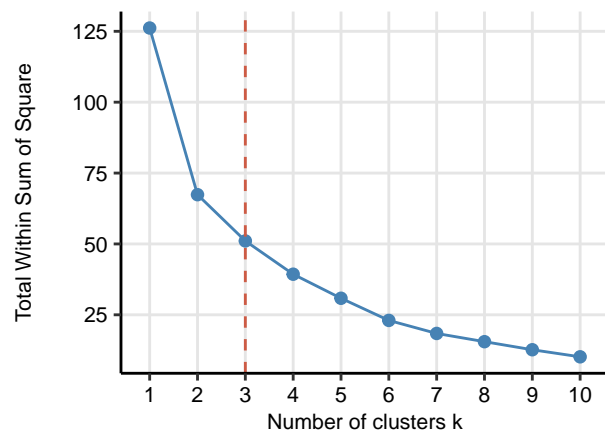**E****Optimal number of SOM node clusters**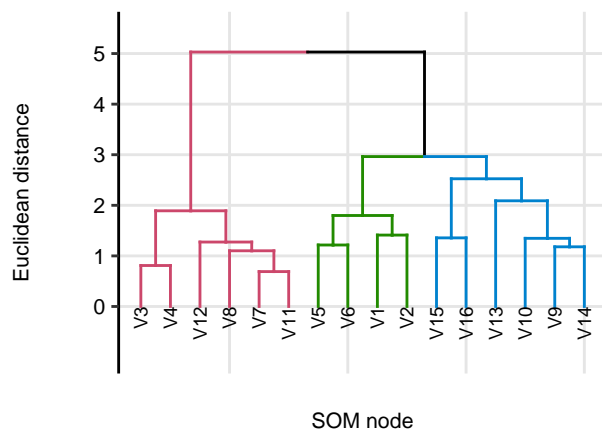**F****Cluster stability vs cluster number**

20-fold cross-validation

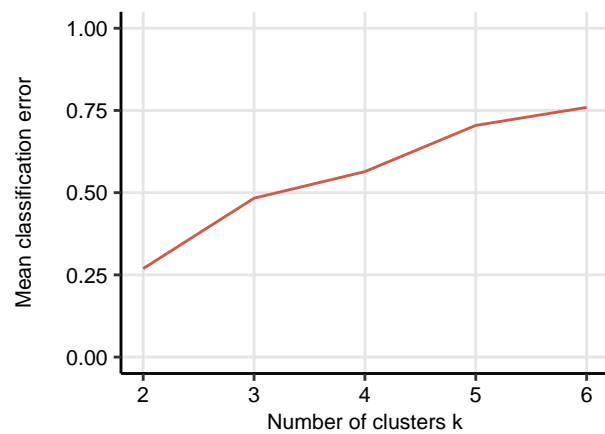

Supplement: supp [file elife_poa_e72500_Figure_7_figure_supplement_1.pdf › elife_poa_e72500_Figure_7_figure_supplement_1.pdf]
