# Supplementary material for: Investigating phenotypes of pulmonary COVID-19 recovery: A longitudinal observational prospective multicenter trial
Source: eLife journal article supplement (doi:10.7554/elife.72500), 2022-01-24
Supplement: supp [file elife_poa_e72500_Figure_8_figure_supplement_1.pdf › elife_poa_e72500_Figure_8_figure_supplement_1.pdf]

**A****Acute COVID-19 severity** $p = 7.1e-21$ 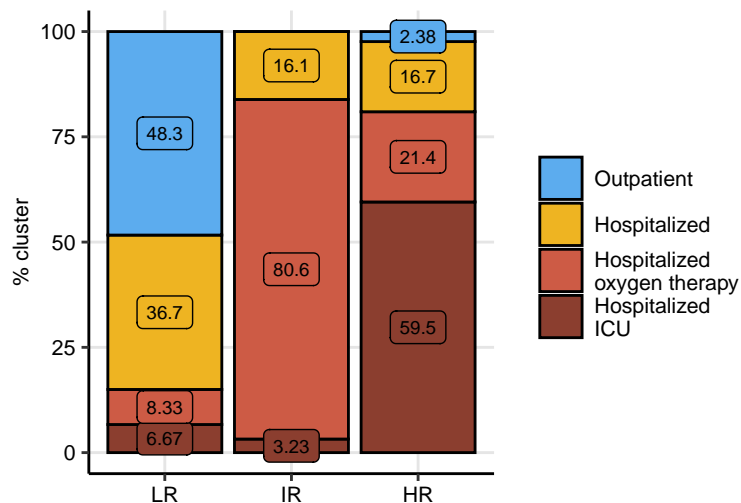

LR : n = 60, IR : n = 31, HR : n = 42

**B****Participant clustering and CT abnormality risk**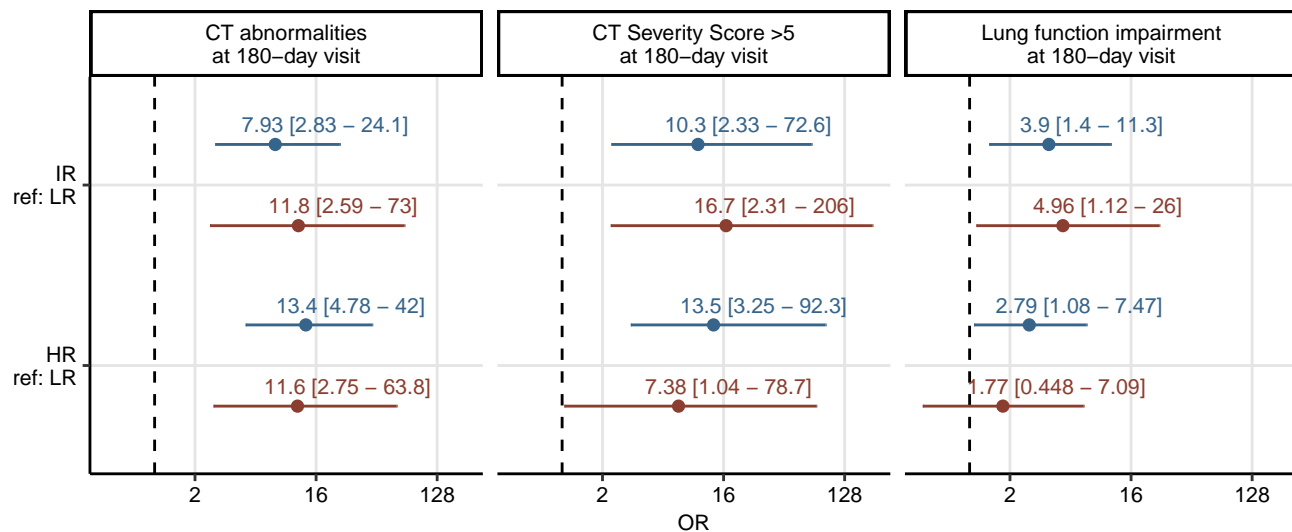

Model type — severity-adjusted — unadjusted

complete: CT: n = 109, lung function: n = 111

CT abnormalities: n = 49, CT Severity Score &gt; 5: n = 21, Lung function impaired: n = 21

LR : n = 60, IR : n = 31, HR : n = 42

Outpatient: n = 27, Hospitalized: n = 31, Hospitalized oxygen therapy: n = 33, Hospitalized ICU: n = 18
