# Supplementary material for: Investigating phenotypes of pulmonary COVID-19 recovery: A longitudinal observational prospective multicenter trial
Source: eLife journal article supplement (doi:10.7554/elife.72500), 2022-01-24
Supplement: supp [file elife_poa_e72500_Figure_9_figure_supplement_1.pdf › elife_poa_e72500_Figure_9_figure_supplement_1.pdf]

CT abnormalities at 180-day visit

|        |      |        |      |      |       |
|--------|------|--------|------|------|-------|
| SVM-R  | 0.44 | 0.36   | 0.51 | 0.76 | 1     |
| RF     | 0.5  | 0.37   | 0.49 | 1    | 0.76  |
| NNet   | 0.29 | 0.42   | 1    | 0.49 | 0.51  |
| glmNet | 0.4  | 1      | 0.42 | 0.37 | 0.36  |
| C5.0   | 1    | 0.4    | 0.29 | 0.5  | 0.44  |
|        | C5.0 | glmNet | NNet | RF   | SVM-R |

Total: n = 109, Events: n = 49

CT Severity Score &gt;5 at 180-day visit

|        |      |        |      |      |       |
|--------|------|--------|------|------|-------|
| SVM-R  | 0.71 | 0.75   | 0.48 | 0.74 | 1     |
| RF     | 0.85 | 0.6    | 0.53 | 1    | 0.74  |
| NNet   | 0.48 | 0.73   | 1    | 0.53 | 0.48  |
| glmNet | 0.6  | 1      | 0.73 | 0.6  | 0.75  |
| C5.0   | 1    | 0.6    | 0.48 | 0.85 | 0.71  |
|        | C5.0 | glmNet | NNet | RF   | SVM-R |

Total: n = 109, Events: n = 21

Symptoms at 180-day visit

|        |      |        |      |      |       |
|--------|------|--------|------|------|-------|
| SVM-R  | 0.28 | 0.39   | 0.33 | 0.46 | 1     |
| RF     | 0.52 | 0.33   | 0.37 | 1    | 0.46  |
| NNet   | 0.3  | 0.4    | 1    | 0.37 | 0.33  |
| glmNet | 0.17 | 1      | 0.4  | 0.33 | 0.39  |
| C5.0   | 1    | 0.17   | 0.3  | 0.52 | 0.28  |
|        | C5.0 | glmNet | NNet | RF   | SVM-R |

Total: n = 133, Events: n = 65

Lung function impairment at 180-day visit

|        |      |        |      |      |       |
|--------|------|--------|------|------|-------|
| SVM-R  | 0.57 | 0.73   | 0.5  | 0.71 | 1     |
| RF     | 0.62 | 0.78   | 0.65 | 1    | 0.71  |
| NNet   | 0.37 | 0.66   | 1    | 0.65 | 0.5   |
| glmNet | 0.55 | 1      | 0.66 | 0.78 | 0.73  |
| C5.0   | 1    | 0.55   | 0.37 | 0.62 | 0.57  |
|        | C5.0 | glmNet | NNet | RF   | SVM-R |

Total: n = 111, Events: n = 38
