# Supplementary material for: Investigating phenotypes of pulmonary COVID-19 recovery: A longitudinal observational prospective multicenter trial
Source: eLife journal article supplement (doi:10.7554/elife.72500), 2022-01-24
Supplement: supp [file elife_poa_e72500_Figure_9_figure_supplement_2.pdf › elife_poa_e72500_Figure_9_figure_supplement_2.pdf]

**CT abnormalities at 180-day visit**

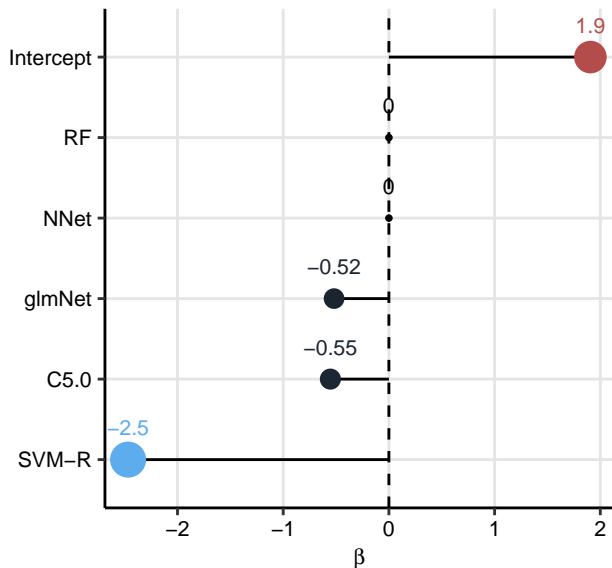

Total: n = 109, Events: n = 49

**CT Severity Score >5 at 180-day visit**

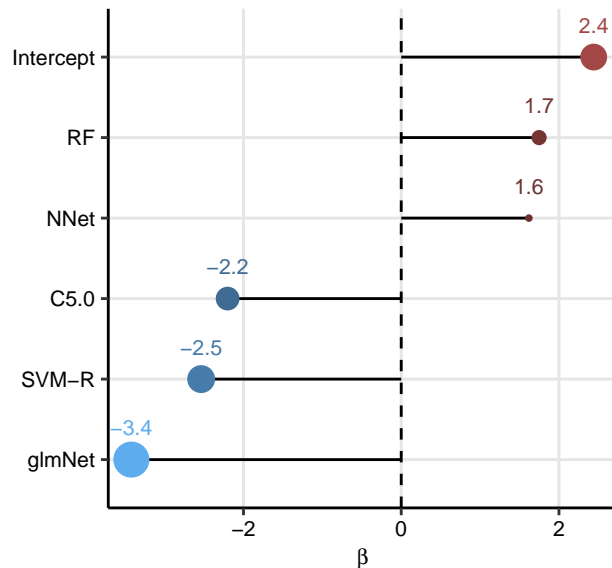

Total: n = 109, Events: n = 21

**Symptoms at 180-day visit**

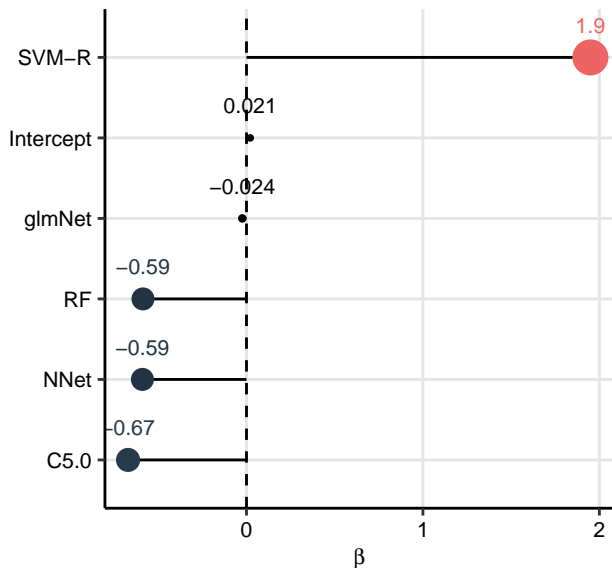

Total: n = 133, Events: n = 65

**Lung function impairment at 180-day visit**

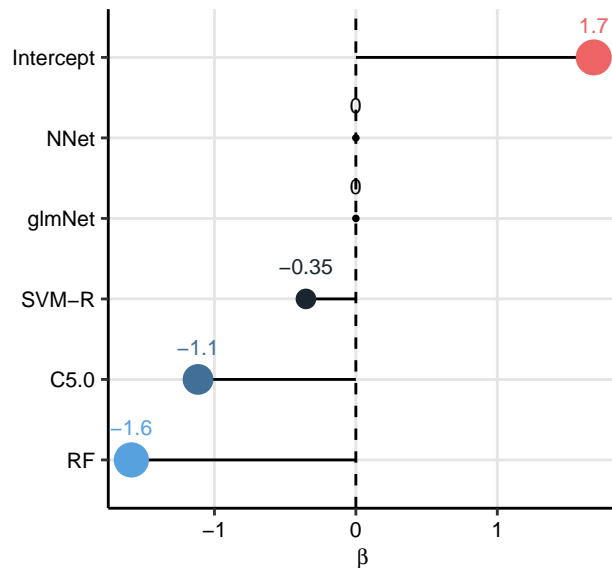

Total: n = 111, Events: n = 38
