# Supplementary material for: Investigating phenotypes of pulmonary COVID-19 recovery: A longitudinal observational prospective multicenter trial
Source: eLife journal article supplement (doi:10.7554/elife.72500), 2022-01-24

**A****C5.0: CT abnormalities at 180-day visit**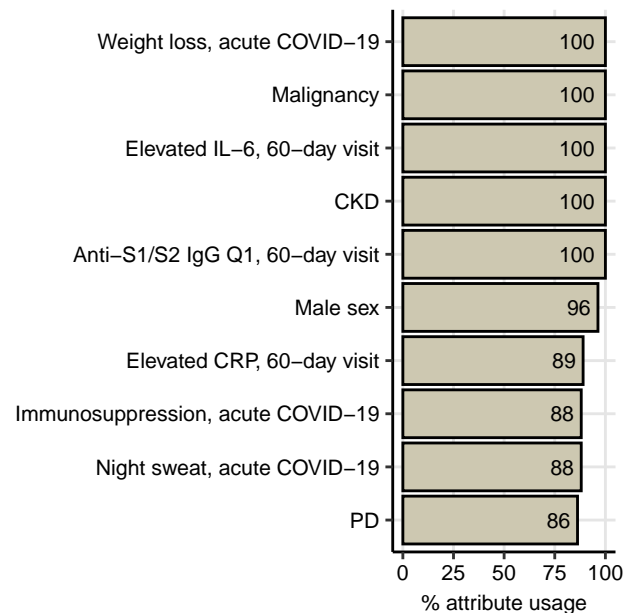**B****RF: CT abnormalities at 180-day visit**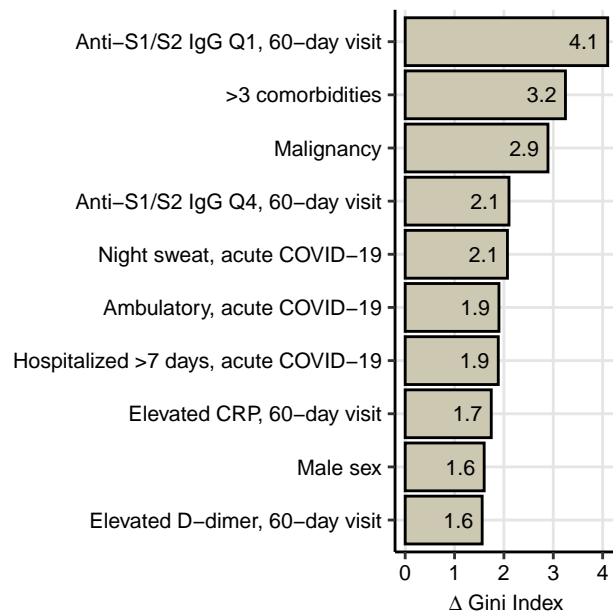**C****glmNet: CT abnormalities at 180-day visit**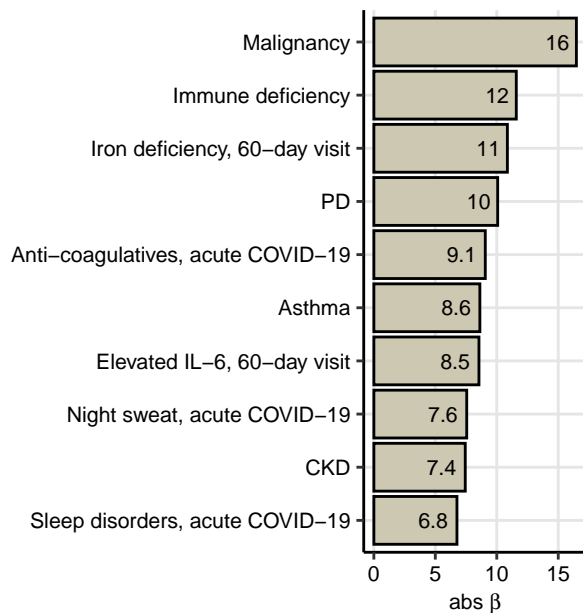

Supplement: supp [file elife_poa_e72500_Figure_9_figure_supplement_4.pdf › elife_poa_e72500_Figure_9_figure_supplement_4.pdf]
