# Supplementary figures and images for: Investigating phenotypes of pulmonary COVID-19 recovery: A longitudinal observational prospective multicenter trial
Source: eLife journal article supplement (doi:10.7554/elife.72500), 2022-01-24

**60 days**

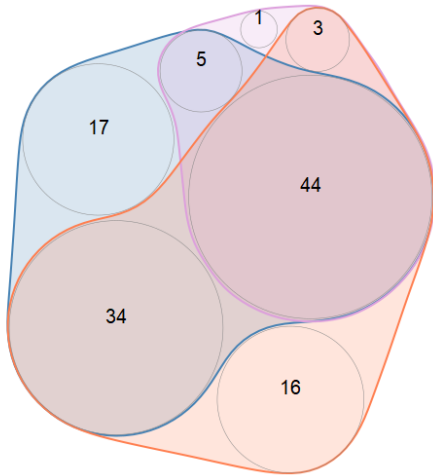

n = 126

**100 days**

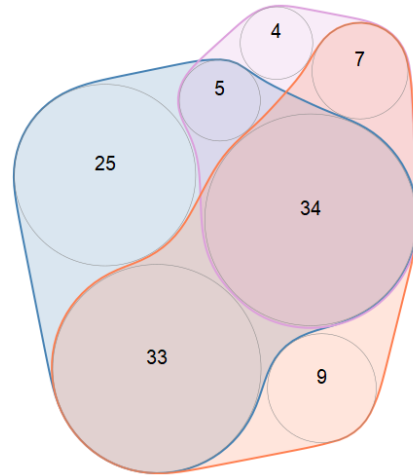

n = 133

**180 days**

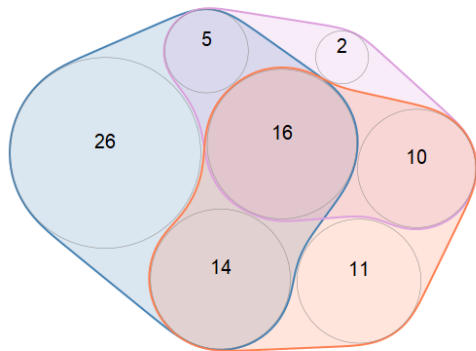

n = 107

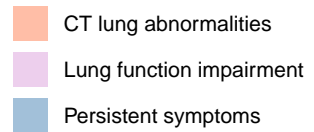

Supplement: supp [file elife_poa_e72500_Figure_3_figure_supplement_1.pdf › elife_poa_e72500_Figure_3_figure_supplement_1.pdf]

**60 days**

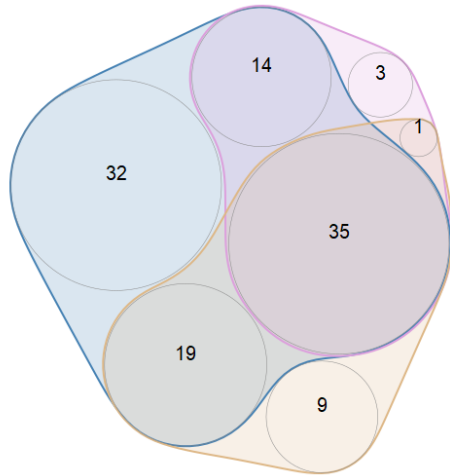

n = 126

**100 days**

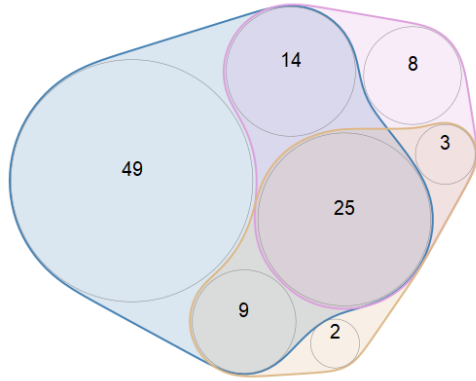

n = 133

**180 days**

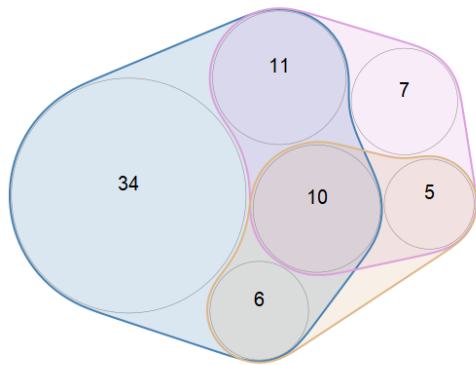

n = 107

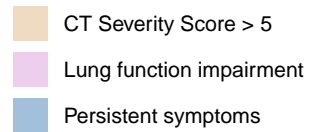

Supplement: supp [file elife_poa_e72500_Figure_3_figure_supplement_2.pdf › elife_poa_e72500_Figure_3_figure_supplement_2.pdf]

**A**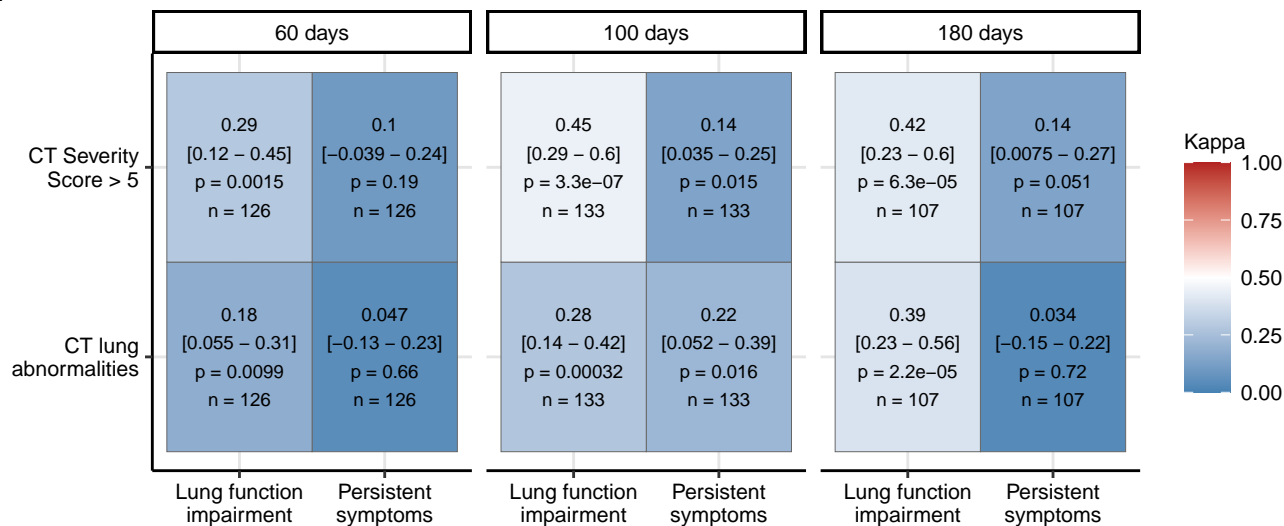**B**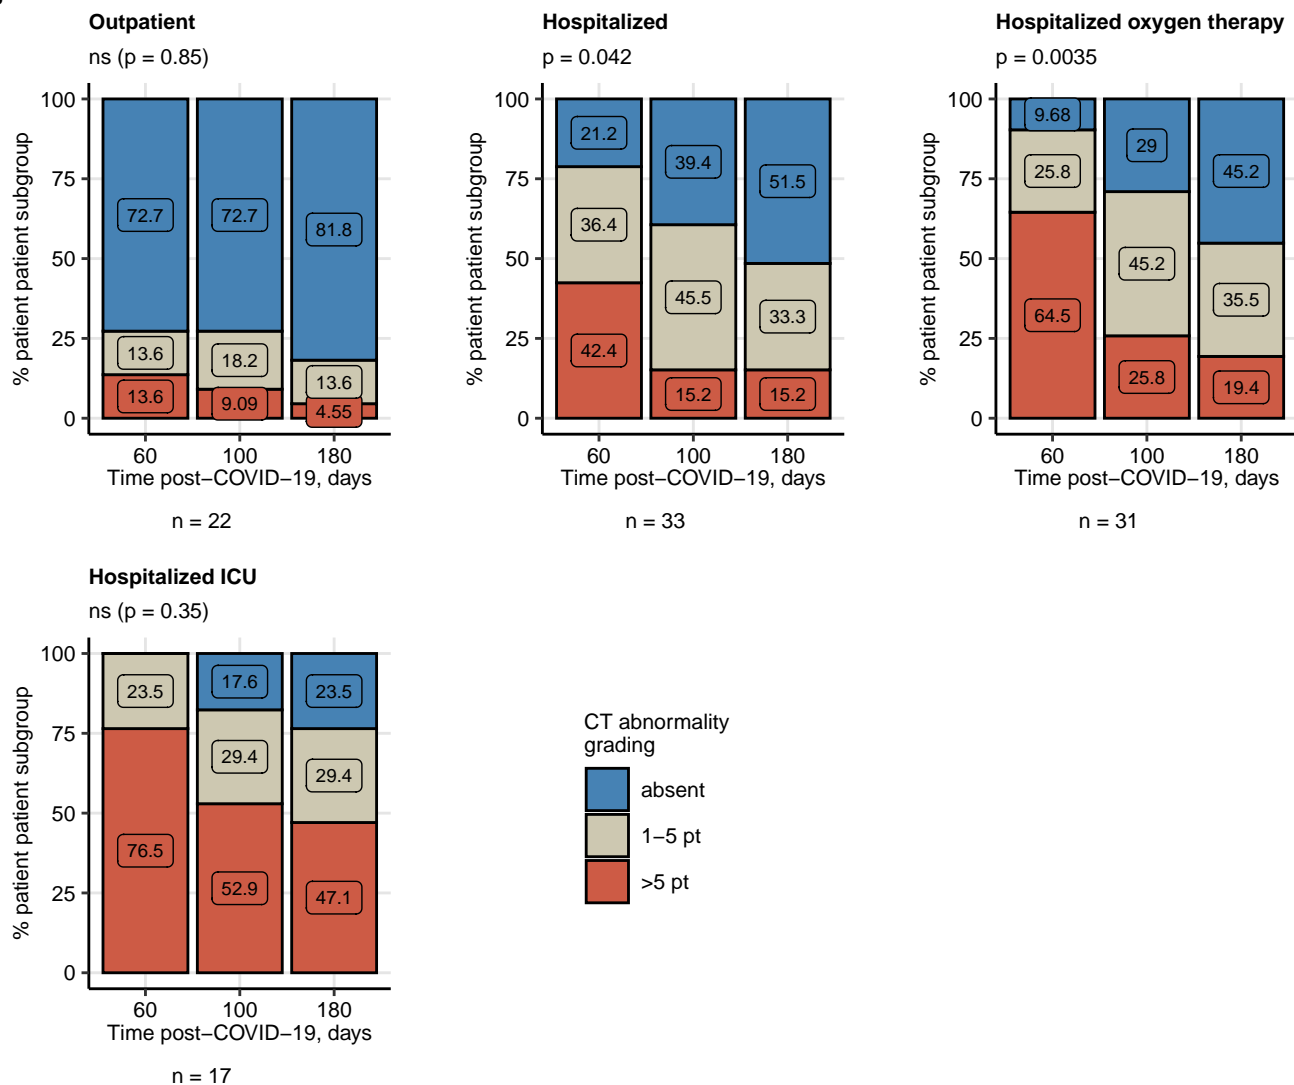

Supplement: supp [file elife_poa_e72500_Figure_3_figure_supplement_3.pdf › elife_poa_e72500_Figure_3_figure_supplement_3.pdf]

# Distances between observations

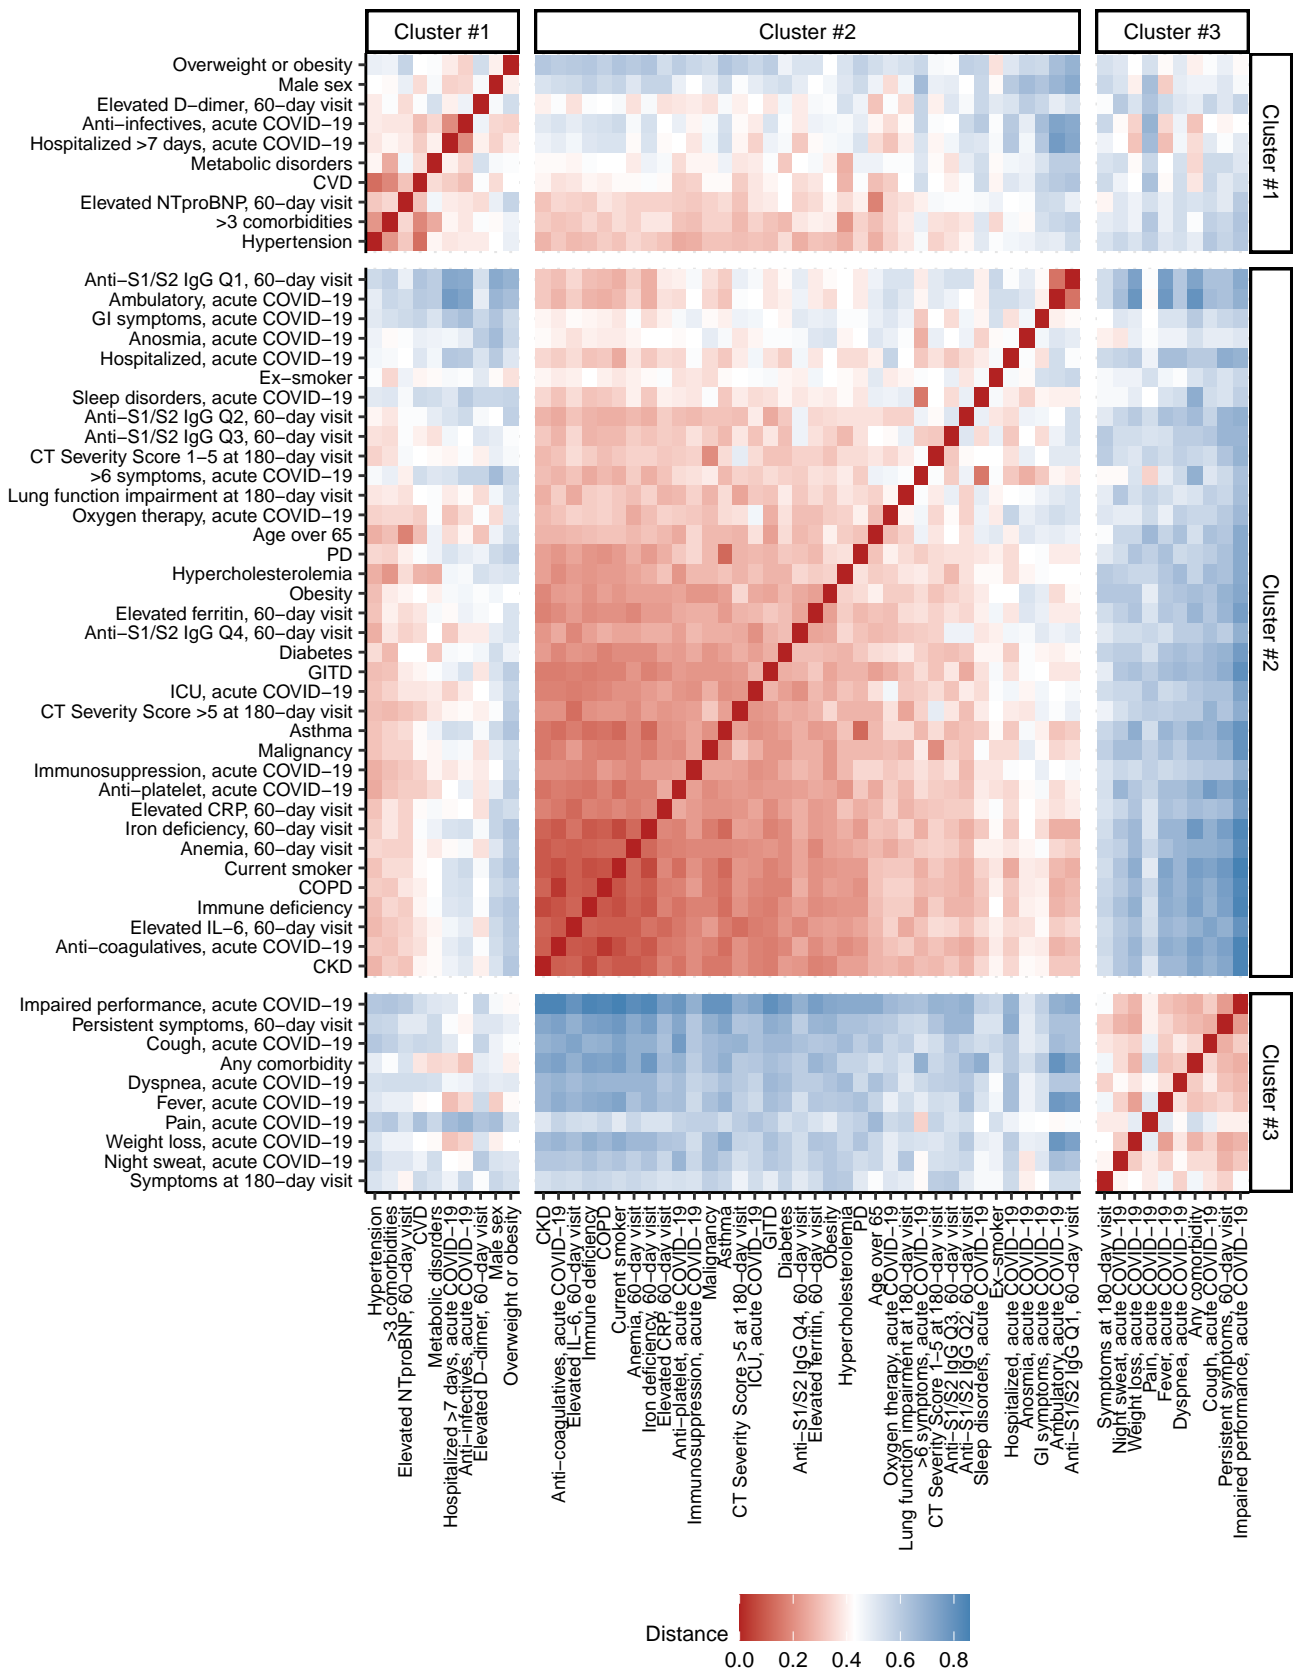

Supplement: supp [file elife_poa_e72500_Figure_6_figure_supplement_2.pdf › elife_poa_e72500_Figure_6_figure_supplement_2.pdf]

# Importance of clustering variables

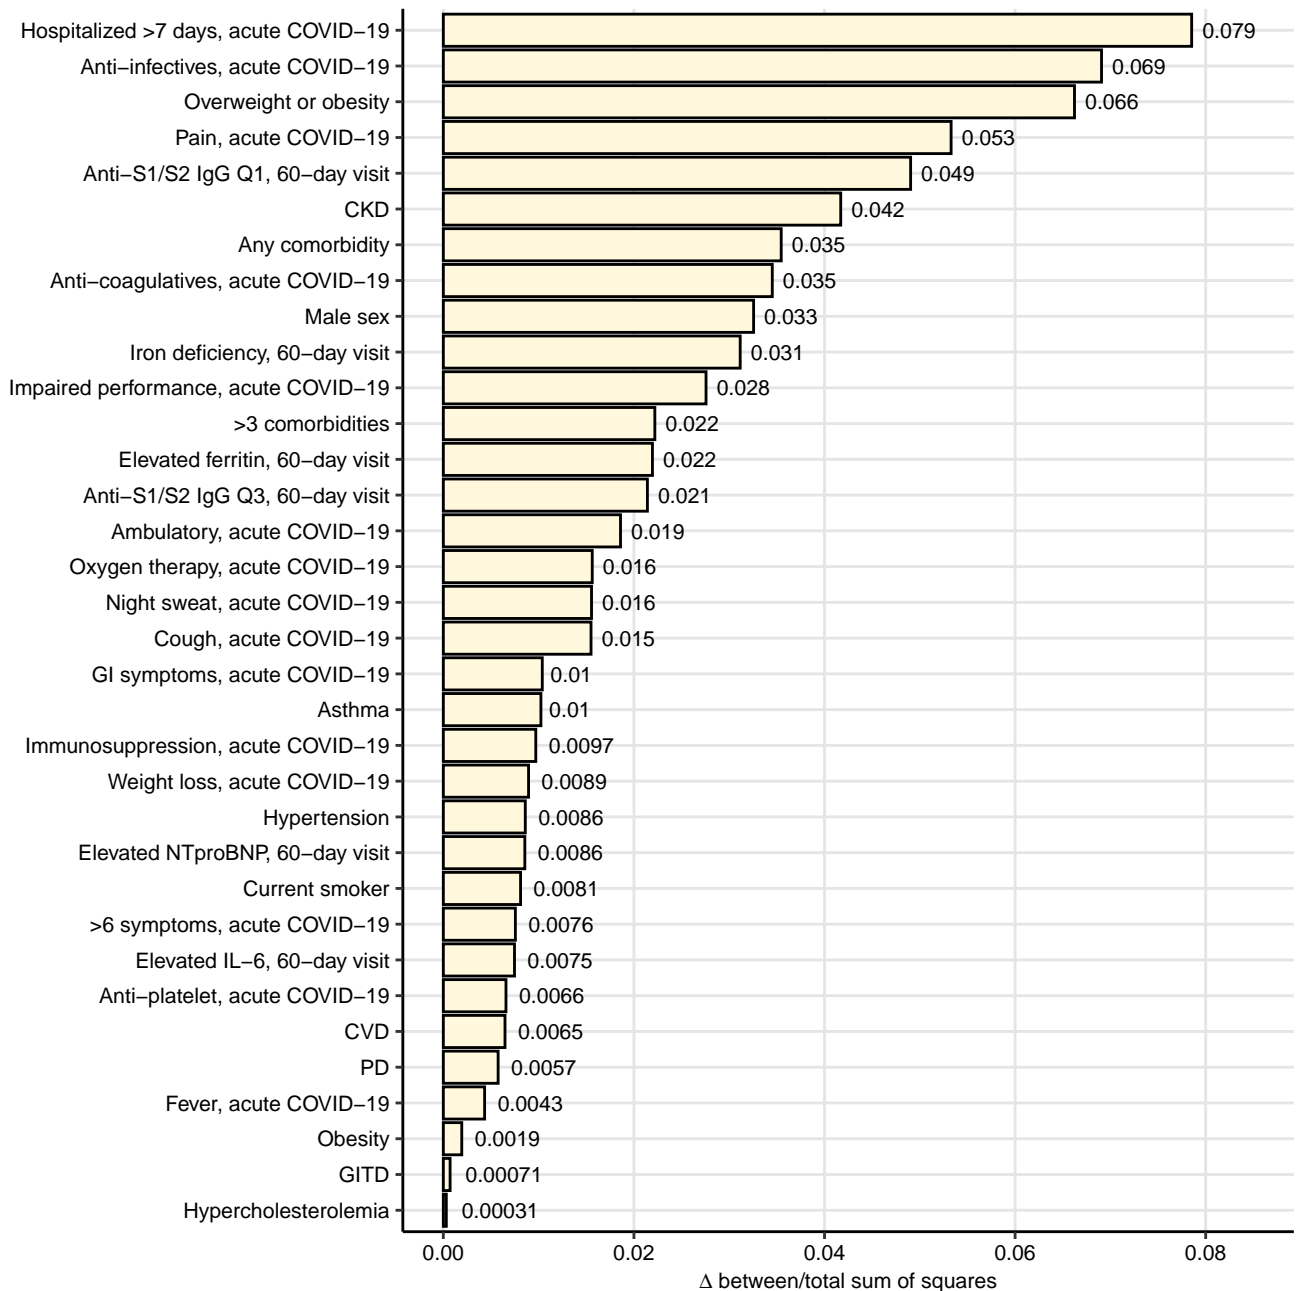

Supplement: supp [file elife_poa_e72500_Figure_7_figure_supplement_2.pdf › elife_poa_e72500_Figure_7_figure_supplement_2.pdf]

**A** C5.0: Symptoms at 180-day visit

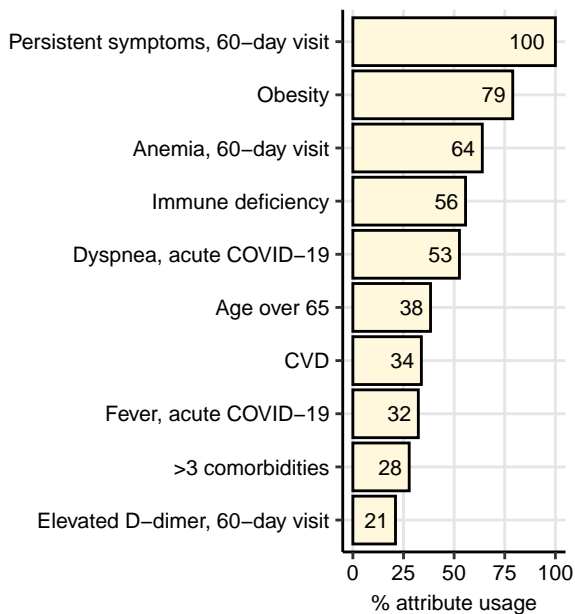

**B** RF: Symptoms at 180-day visit

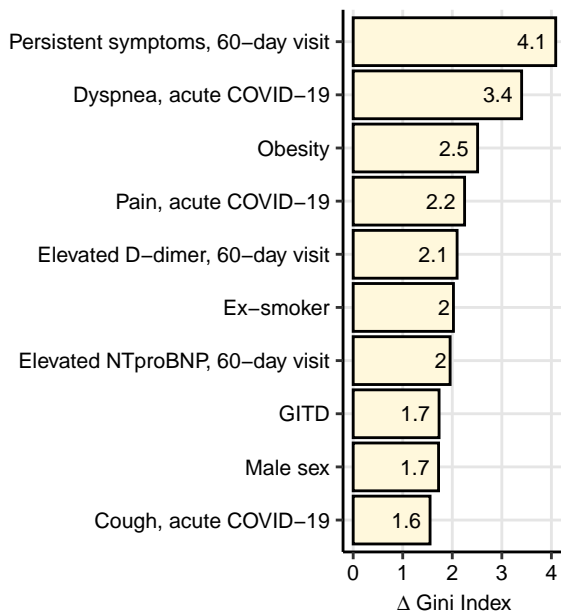

**C** glmNet: Symptoms at 180-day visit

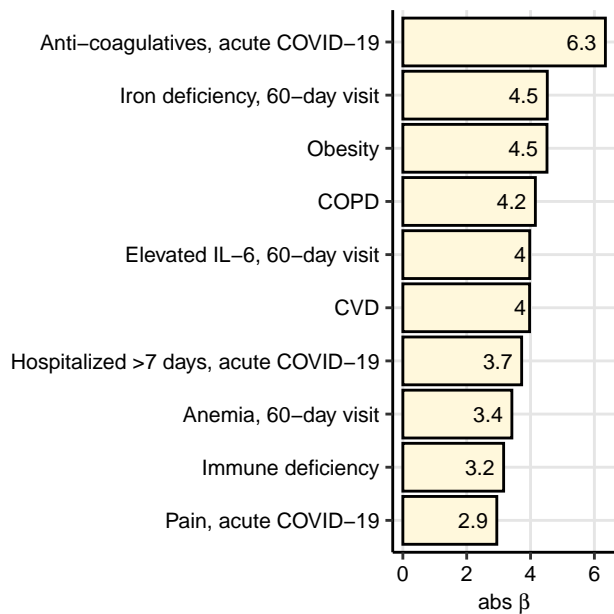

Supplement: supp [file elife_poa_e72500_Figure_9_figure_supplement_7.pdf › elife_poa_e72500_Figure_9_figure_supplement_7.pdf]
